# Supplementary material for: Supersilyl as an effective monodentate ligand to stabilize four-coordinate manganese(ii) complexes
Source: Royal Society of Chemistry journal article supplement (doi:10.1039/d0dt03837g), 2020-01-01
Supplement: d0dt03837g1.pdf [file d0dt03837g1.pdf]

**Supporting information for**

**Supersilyl as an Effective Monodentate Spectator  
Ligand to Stabilize Four-Coordinate  
Manganese(II) Complexes**

Shogo Arata, Kosuke Suzuki, Kazuya Yamaguchi and Yusuke Sunada

**Contents**

|                                |         |
|--------------------------------|---------|
| 1. General                     | p. S-2  |
| 2. Synthesis of <b>2-5</b>     | p. S-2  |
| 3. Spectral data of <b>2-5</b> | p. S-4  |
| 4. Magnetic susceptibilities   | p. S-7  |
| 5. X-ray diffraction analysis  | p. S-9  |
| 6. References                  | p. S-47 |

**General.** Manipulation of air and moisture sensitive compounds was carried out under a dry nitrogen atmosphere using Schlenk tube techniques associated with a high-vacuum line or in the glove box which was filled with dry nitrogen. All solvents were distilled purchased from Kanto Chemical Co. Inc., and was dried over activated molecular sieves.  $^1\text{H}$  and  $^{13}\text{C}$  NMR spectra were recorded on a JEOL Lambda 400 spectrometer at ambient temperature.  $^1\text{H}$  and  $^{13}\text{C}$  NMR chemical shifts ( $\delta$  values) were given in ppm relative to the solvent signals. Elemental analyses for complexes **2** and **4** were performed by a Thermo Scientific FLASH 2000 Organic Elemental Analyzer, and Elemental analyses for complexes **3** and **5** were performed at the A Rabbit Science Co., Ltd. IR spectrum was recorded on a PerkinElmer Spectrum Two spectrometer. Magnetic susceptibility data of the solid samples were measured on Quantum Design MPMS-XL7. Dc magnetic susceptibility measurements were carried out under the applied field of 0.1 T in the temperature range of 1.9–300 K. Potassium tris(trimethylsilyl)silanide was synthesized by the method reported in the literature.<sup>1</sup> All reagents were purchased from Tokyo Chemical Industries Co., Ltd., Sigma-Aldrich or Kanto Chemical Co., Inc. and were used without further purification.

**Synthesis of  $\{[\text{Si}(\text{SiMe}_3)_3](\text{THF})\text{Mn}(\mu\text{-Br})\}_2$  (**2**).** In a 50 mL schlenk tube,  $\text{MnBr}_2$  (1 g, 4.66 mmol) was suspended in THF (20 mL), then potassium tris(trimethylsilyl)silanide, generated from the reaction of  $\text{Si}(\text{SiMe}_3)_4$  (1.57 g, 4.89 mmol) with  $\text{KO}^t\text{Bu}$  (548.6 mg, 4.89 mmol) in THF (20 mL), was slowly added to this solution at room temperature. The solution was stirred at room temperature for 1 h. Then the solution was centrifuged to remove the insoluble materials. The mother liquid was evaporated *in vacuo*, and the obtained solid was dissolved in pentane (60 mL). The solution was again centrifuged to remove the insoluble materials. The supernatant was collected, and concentrated to ca. 20 mL. The remaining solution was cooled at  $-20\text{ }^\circ\text{C}$  to afford complex **2** as colorless crystals in 72% yield (1.52 g, 1.67 mmol).  $^1\text{H}$  NMR (400 MHz, r.t.,  $\text{C}_6\text{D}_6$ ):  $\delta$  = 4.78 (brs, 54H,  $\text{SiMe}_3$ ), 14.99 (brs, 8H, THF), 35.77 (brs, 8H, THF). Magnetic susceptibility (Evans):  $\mu_{\text{eff}} = 6.52$  (in  $\text{C}_6\text{D}_6$ ,  $21\text{ }^\circ\text{C}$ ). Anal. Calcd. for  $\text{C}_{26}\text{H}_{70}\text{O}_2\text{Si}_8\text{Mn}_2\text{Br}_2$ : C, 34.35; H, 7.76. Found: C, 34.05; H, 7.63.

**Synthesis of  $\{[\text{Si}(\text{SiMe}_3)_3](\text{THF})\text{Mn}(\mu\text{-O}^t\text{Bu})\}_2$  (**3**).** In a 10 mL schlenk tube, complex **2** (100 mg, 0.11 mmol) was dissolved in THF (3 mL), then  $\text{KO}^t\text{Bu}$  (24.6 mg, 0.22 mmol) in THF (5 mL) was added to this solution at room temperature. The solution was stirred at room temperature for overnight. The solvent was removed *in vacuo*, then the remaining product was extracted with pentane (20 mL). The solution was centrifuged to remove the insoluble materials. The supernatant was collected, and the solvent was concentrated to ca. 2 mL. The remaining solution was cooled at  $-30\text{ }^\circ\text{C}$ , then **3** was obtained as colorless crystals in 85 % yield (84 mg, 0.08 mmol).  $^1\text{H}$  NMR (400 MHz, r.t.,  $\text{C}_6\text{D}_6$ ):  $\delta$  = 3.29 (brs). Magnetic susceptibility (Evans):  $\mu_{\text{eff}} = 6.78$  (in  $\text{C}_6\text{D}_6$ ,  $20\text{ }^\circ\text{C}$ ). Anal. Calcd. for  $\text{C}_{34}\text{H}_{88}\text{O}_4\text{Si}_8\text{Mn}_2$ : C, 45.60; H, 9.90. Found: C, 45.59; H, 10.59.

Complex **3** can also be synthesized as follows: In a 50 mL schlenk tube,  $\text{MnBr}_2$  (140.0 mg, 0.65 mmol) was suspended in THF (20 mL), then THF (10 mL) solution of  $\text{K}[\text{Si}(\text{SiMe}_3)_3] \cdot 1.0\text{THF}$  (250.0 mg, 0.70 mmol) was added to this solution at room temperature. The solution was stirred at room temperature for 3 h, then  $\text{KO}^t\text{Bu}$  (73.0 mg, 0.65 mmol) was added to this solution. The obtained solution was stirred at room temperature for overnight. The solvent was removed *in vacuo*, then the remaining product was extracted with pentane (40 mL). The solution was centrifuged to remove the insoluble materials. The supernatant was collected, and the

solvent was concentrated to ca. 5 mL. The remaining solution was cooled at -30 °C, then **3** was obtained as colorless crystals in 79 % yield (231.8 mg, 0.26 mmol).

**Synthesis of  $\{\text{Si}(\text{SiMe}_3)_3\}(\text{iPr}_2\text{IM}^{\text{Me}})_2\text{MnMe}$  (**4**).** In a 10 mL schlenk tube, complex **2** (200 mg, 0.22 mmol) was dissolved in THF (20 mL), then  $\text{iPr}_2\text{IM}^{\text{Me}}$  (160.8 mg, 0.88 mmol) was added to this solution at room temperature. The solution was stirred at room temperature for 1 h. In the course of the reaction, the color of the solution was changed from colorless to pale yellow. The obtained solution was cooled to -78 °C, then 1.18 mL (1.32 mmol) of MeLi (1.12 M diethyl ether solution) was added. The solution was stirred at room temperature for overnight, then the solvent was removed *in vacuo*. The remaining product was extracted with diethyl ether (20 mL), then the solution was centrifuged to remove the insoluble materials. The supernatant was collected, and the solvent was concentrated to ca. 8 mL. The remaining solution was cooled at -20 °C, then **4** was obtained as pale pink crystals in 53 % yield (157.7 mg, 0.233 mmol).  $^1\text{H}$  NMR (400 MHz, r.t.,  $\text{C}_6\text{D}_6$ ):  $\delta = 5.61$  (brs), 18.74 (brs). Magnetic susceptibility (Evans):  $\mu_{\text{eff}} = 7.11$  (in  $\text{C}_6\text{D}_6$ , 21 °C). Anal. Calcd. for  $\text{C}_{32}\text{H}_{70}\text{N}_4\text{Si}_4\text{Mn}$ : C, 56.67; H, 10.40; N, 8.26. Found: C, 56.53; H, 10.53; N, 8.32.

**Synthesis of  $[\{\text{Si}(\text{SiMe}_3)_3\}(\text{iPr}_2\text{IM}^{\text{Me}})\text{Mn}(\text{m-H})]_2$  (**5**).** In a 10 mL schlenk tube, complex **2** (454.6 mg, 0.50 mmol) was dissolved in THF (20 mL), then  $\text{iPr}_2\text{IM}^{\text{Me}}$  (364.6 mg, 2.02 mmol) was added to this solution at room temperature. The solution was stirred at room temperature for 1 h. In the course of the reaction, the color of the solution was changed from colorless to pale yellow. The obtained solution was cooled to -78 °C, then 1.0 mL (1.0 mmol) of  $\text{NaBEt}_3\text{H}$  (1.0 M THF solution) was added. The solution was stirred at room temperature for overnight, then the solvent was removed *in vacuo*. The remaining product was extracted with diethyl ether (50 mL), then the solution was centrifuged to remove the insoluble materials. The supernatant was collected, and the solvent was concentrated to ca. 30 mL. The remaining solution was cooled at -20 °C, then **5** was obtained as brown crystals in 58 % yield (282.8 mg, 0.292 mmol).  $^1\text{H}$  NMR (400 MHz, r.t.,  $\text{C}_6\text{D}_6$ ):  $\delta = 2.75$  (brs), 16.13 (brs). IR(ATR): 2978, 2955, 2930, 2898, 1629, 1550, 1457, 1399, 1374, 1340, 1245, 1208, 1198, 1140, 1105, 1012, 819, 751, 667, 619, 595, 569, 531  $\text{cm}^{-1}$ . Magnetic susceptibility (Evans):  $\mu_{\text{eff}} = 5.05$  (in  $\text{C}_6\text{D}_6$ , 21 °C). Anal. Calcd. for  $\text{C}_{40}\text{H}_{96}\text{N}_4\text{Si}_8\text{Mn}_2$ : C, 49.64; H, 10.00; N, 5.79. Found: C, 49.64; H, 10.31; N, 5.51.

**Figure S1.**  $^1\text{H}$  NMR spectrum of **2** in  $\text{C}_6\text{D}_6$  at room temperature.

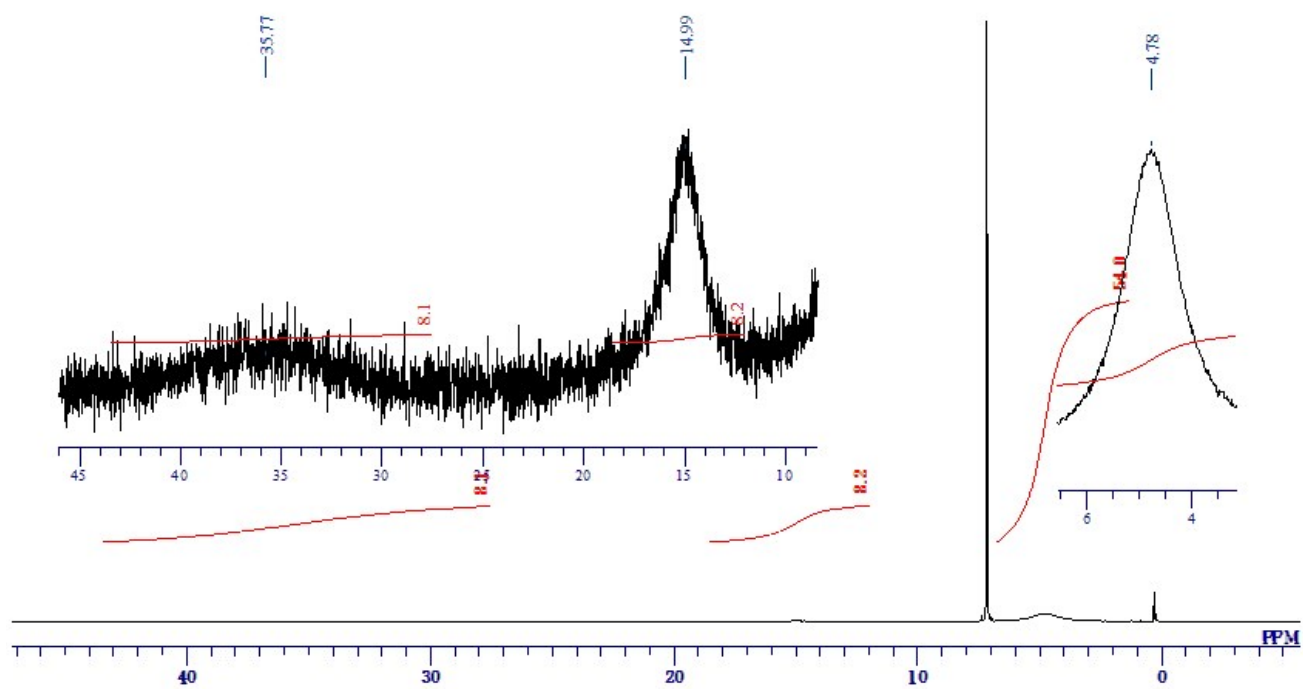

**Figure S2.**  $^1\text{H}$  NMR spectrum of **3** in  $\text{C}_6\text{D}_6$  at room temperature.

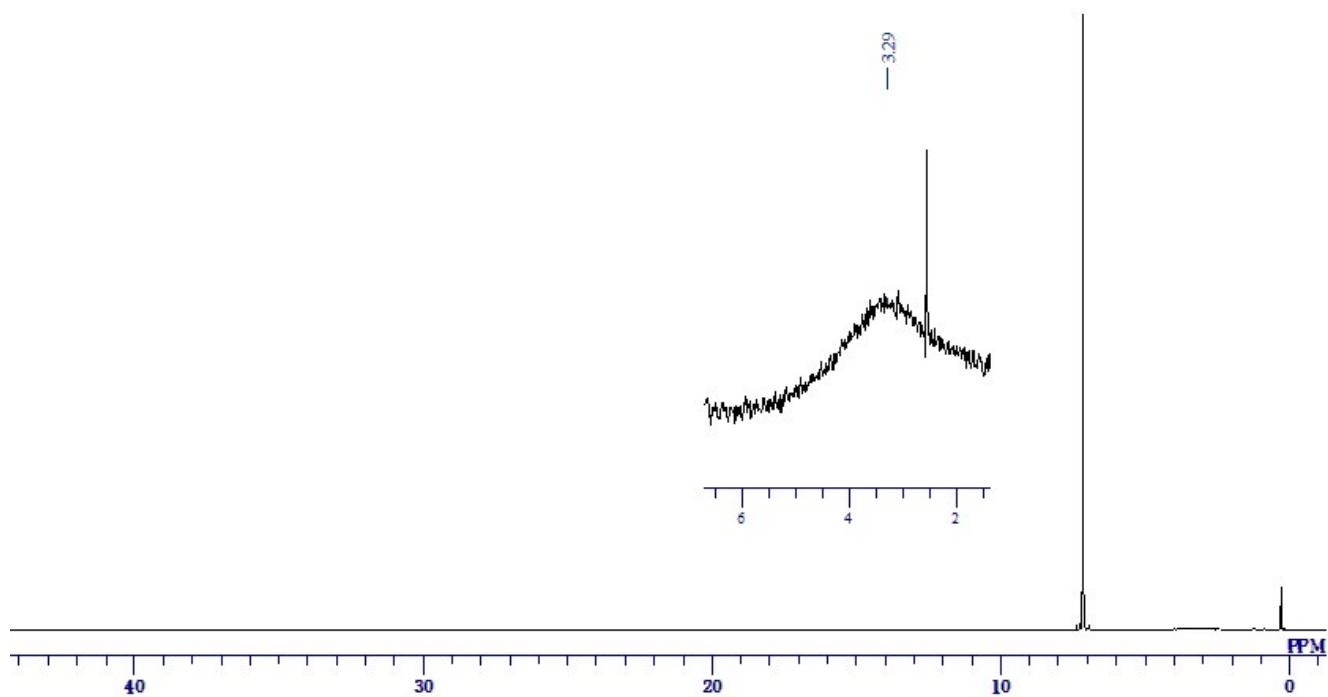

**Figure S3.**  $^1\text{H}$  NMR spectrum of **4** in  $\text{C}_6\text{D}_6$  at room temperature.

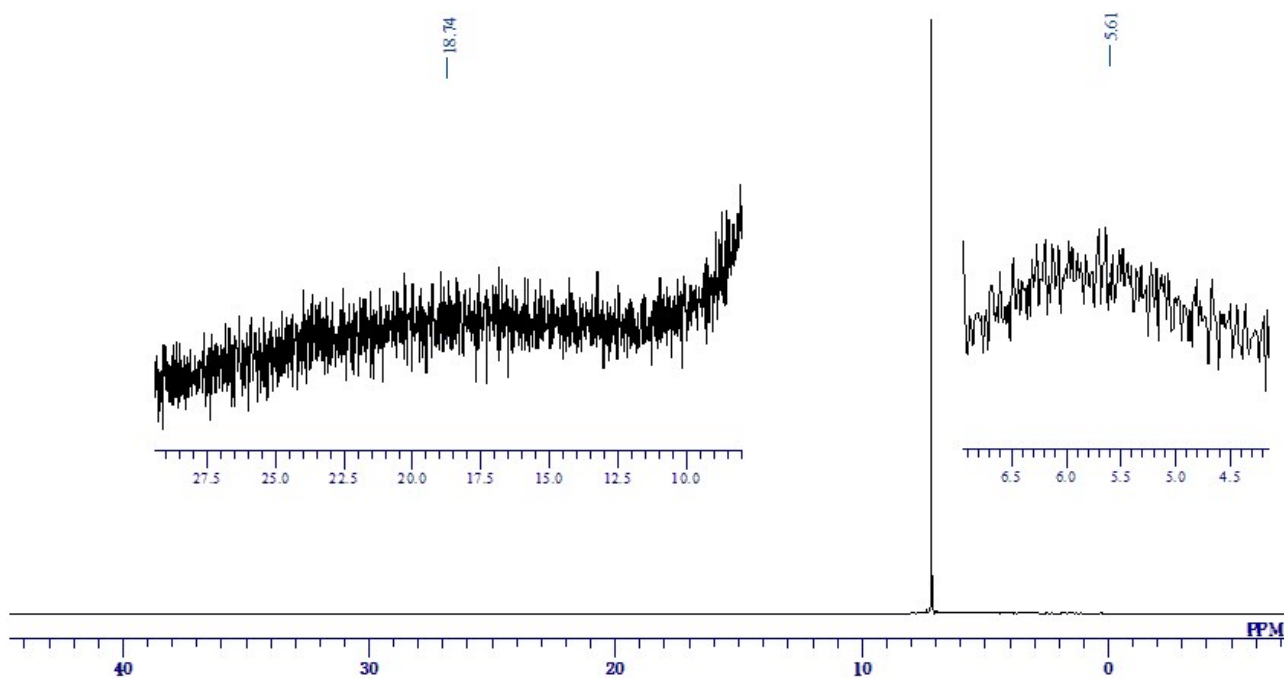

**Figure S4.**  $^1\text{H}$  NMR spectrum of **5** in  $\text{C}_6\text{D}_6$  at room temperature.

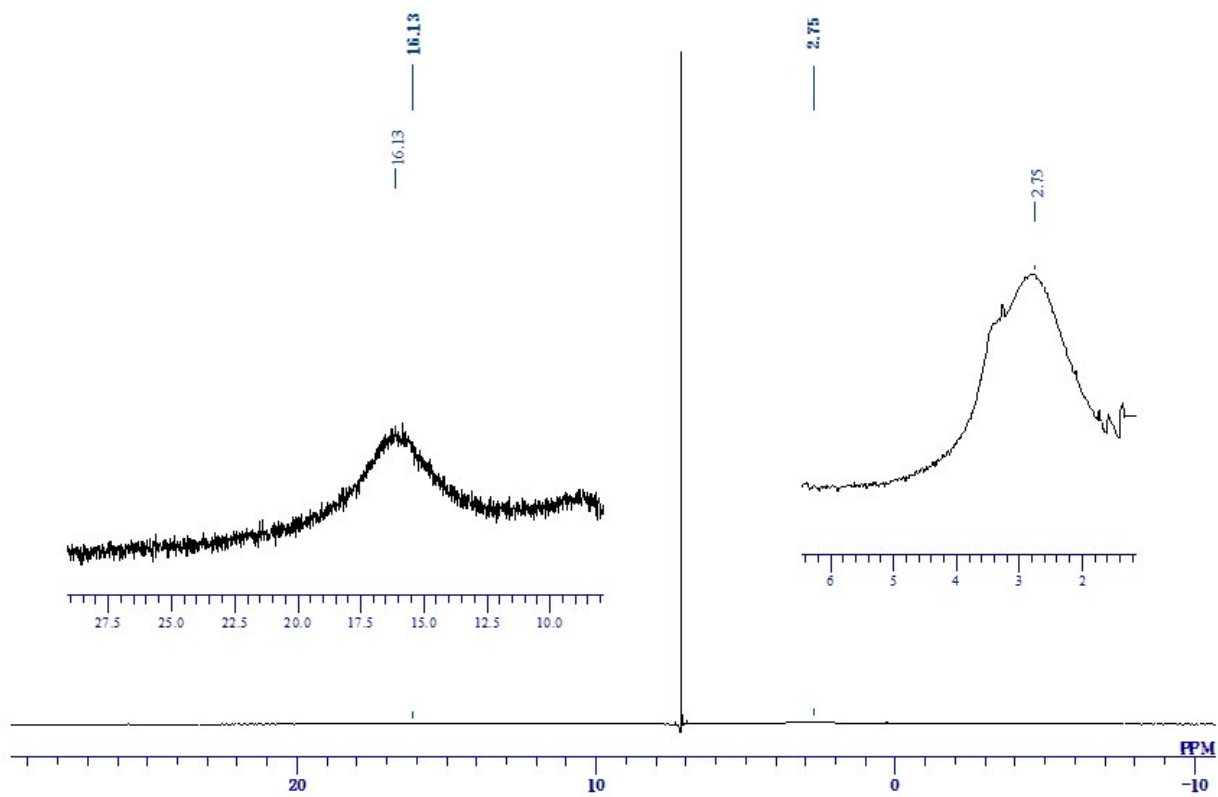

**Figure S5.** ATR-IR spectrum of **5** in the solid state.

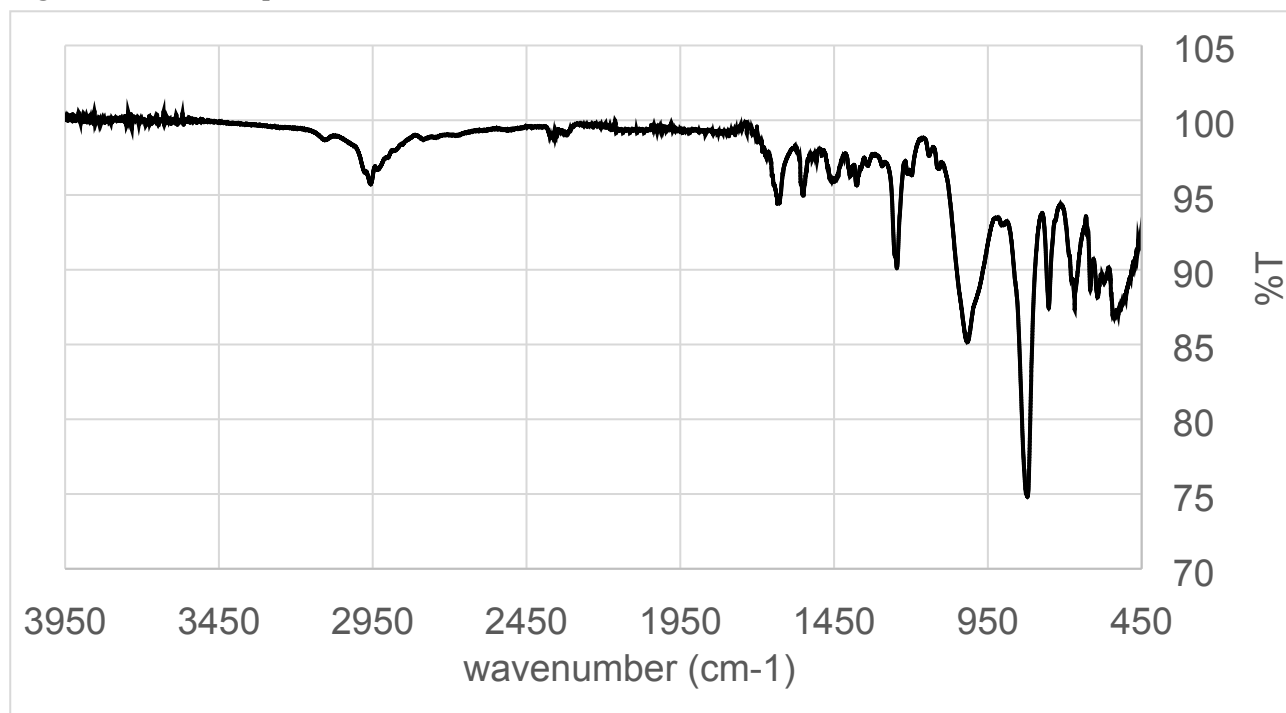

## Magnetic susceptibilities

Magnetic susceptibilities of solid samples were measured using a Quantum Design MPMS-XL7. Direct current (dc) field-cooling magnetic susceptibility measurements were carried out between 1.9 and 300 K under 0.1 T magnetic field. Diamagnetic corrections were applied by the diamagnetism of the sample holder. The magnetic interactions were analyzed by fitting the temperature-dependence of magnetic susceptibilities in the temperature range of 20-300 K with the following isotropic spin Heisenberg–Dirac–van Vleck Hamiltonian

$$H = -2JS_{Mn1}S_{Mn2}$$

where  $J$  represent the exchange constants of two manganese centers. The  $g$  values for Mn(II) was fixed to 2. The analyses were carried out by using the PHI program.<sup>2</sup>

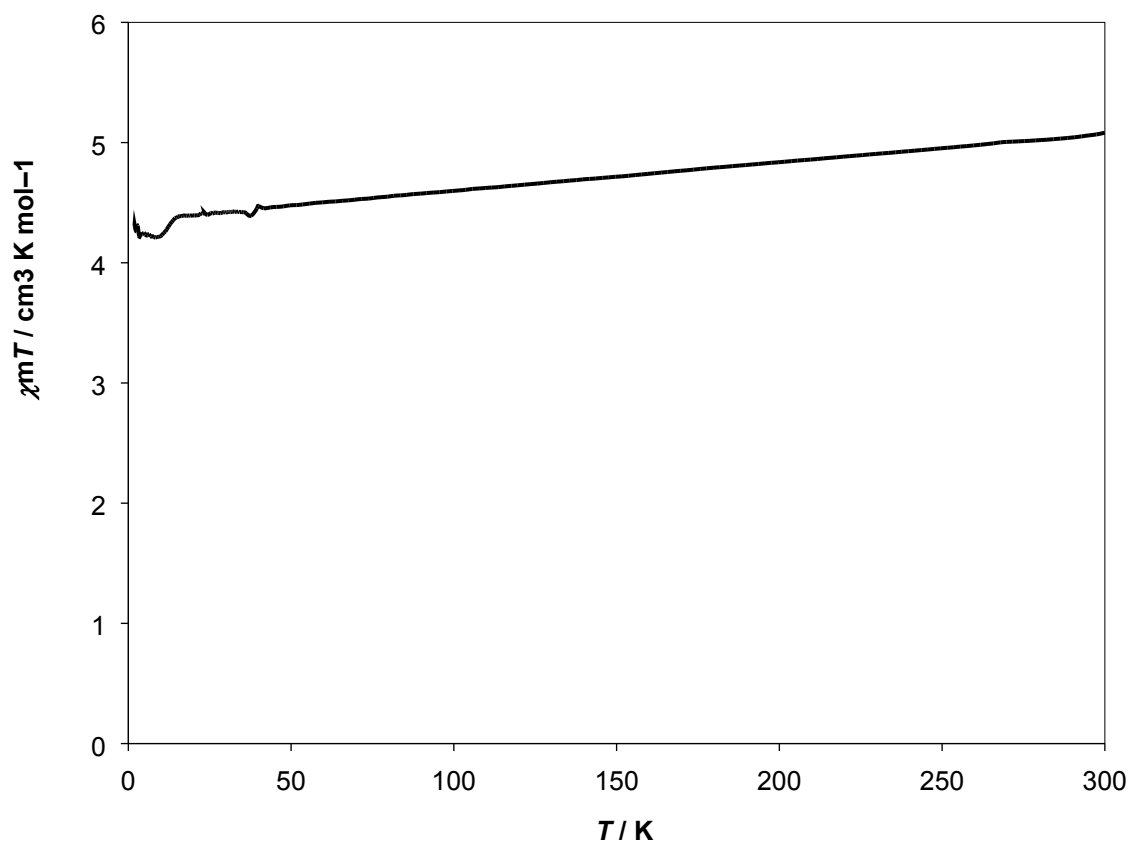

**Figure S6-1.** Temperature dependences of  $\chi_m T$  for **1** under the applied dc field of 0.1 T.

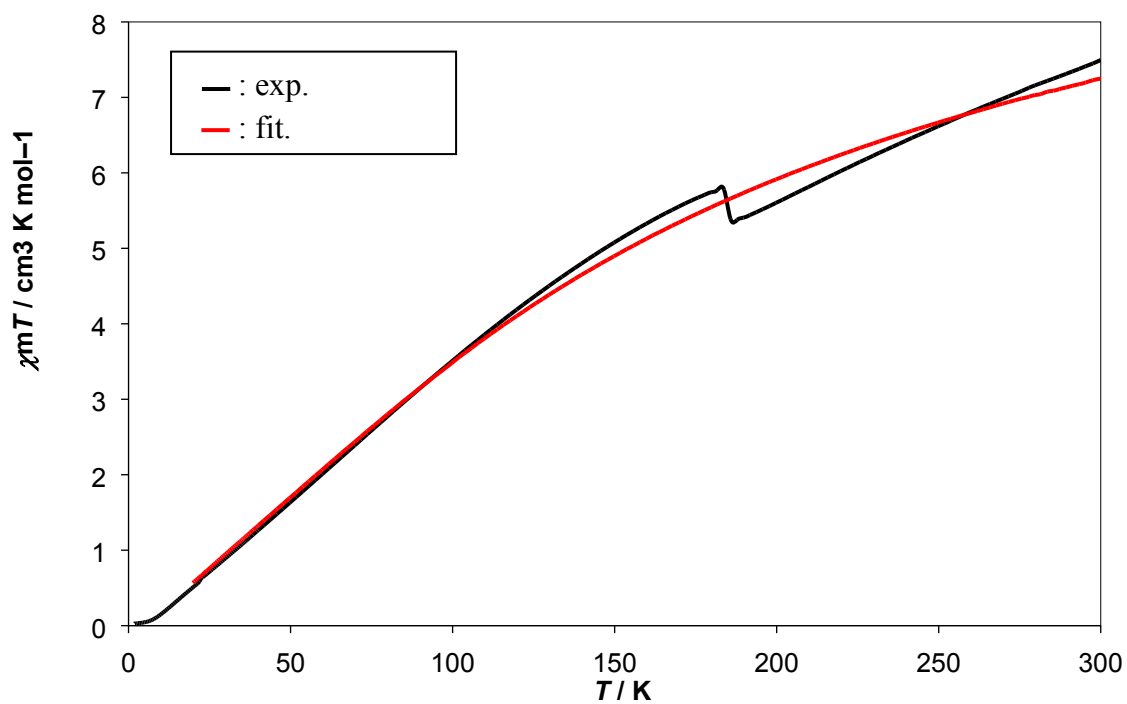

**Figure S6-2.** Temperature dependences of  $\chi_m T$  for **2** under the applied dc field of 0.1 T. The solid line represents the best fit adopting the Heisenberg–Dirac–Van Vleck Hamiltonian.

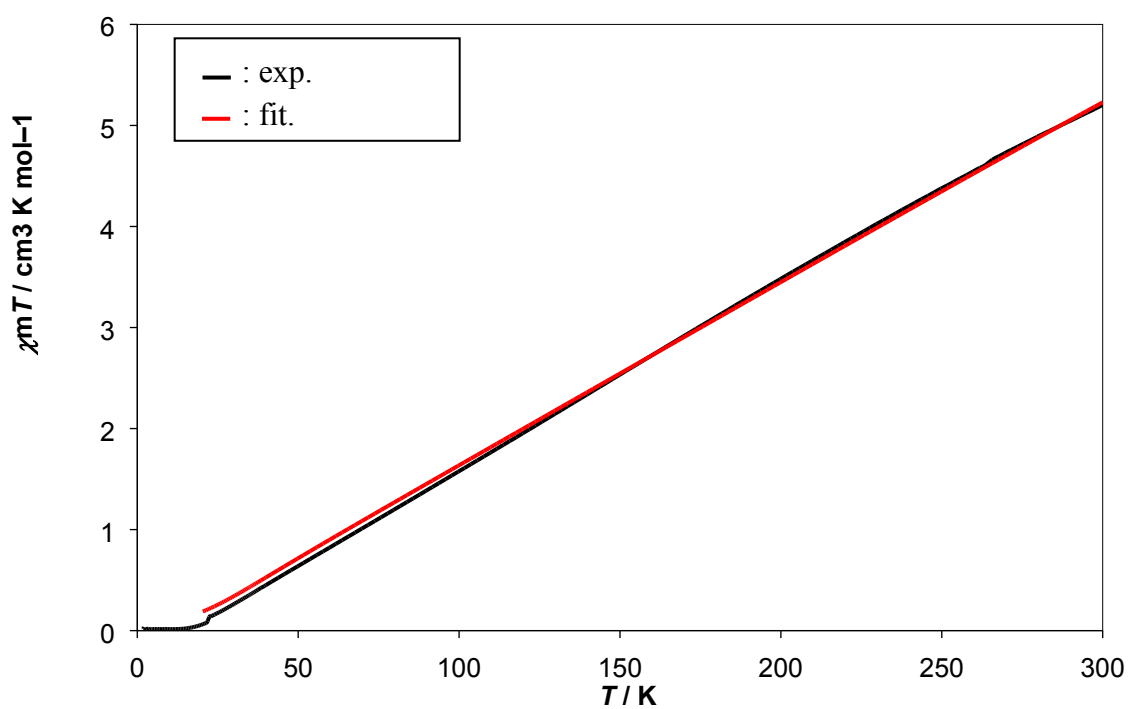

**Figure S6-3.** Temperature dependences of  $\chi_m T$  for **5** under the applied dc field of 0.1 T. The solid line represents the best fit adopting the Heisenberg–Dirac–Van Vleck Hamiltonian.



### X-ray data collection and reduction

X-ray crystallography was performed on a Rigaku Saturn CCD area detector with graphite monochromated Mo-K $\alpha$  radiation ( $\lambda=0.71075$  Å). The data were collected at 213 K for **2**, 243 K for **3**, and 203 K for **4** and **5** using  $\omega$  scan in the  $\theta$  range of  $3.14 \leq \theta \leq 27.49$  deg (**2**),  $3.01 \leq \theta \leq 27.49$  deg (**3**),  $3.17 \leq \theta \leq 27.48$  deg (**4**) and  $3.03 \leq \theta \leq 27.49$  deg (**5**). The data obtained were processed using Crystal-Clear (Rigaku) on a Pentium computer, and were corrected for Lorentz and polarization effects. The structures were solved by direct methods<sup>3</sup>, and expanded using Fourier techniques. Hydrogen atoms were refined using the riding model. The final cycle of full-matrix least-squares refinement on  $F^2$  was based on 5517 observed reflections and 181 variable parameters for **2**, 6162 observed reflections and 212 variable parameters for **3**, 9686 observed reflections and 370 variable parameters for **4** and 7644 observed reflections and 248 variable parameters for **5**. Neutral atom scattering factors were taken from International Tables for Crystallography (IT), Vol. C, Table 6.1.1.4<sup>4</sup>. Anomalous dispersion effects were included in  $F_{\text{calc}}$ <sup>5</sup>; the values for  $\Delta f'$  and  $\Delta f''$  were those of Creagh and McAuley<sup>6</sup>. The values for the mass attenuation coefficients are those of Creagh and Hubbell<sup>7</sup>. All calculations were performed using the CrystalStructure<sup>8</sup> crystallographic software package except for refinement, which was performed using SHELXL Version 2017/1<sup>9</sup>. Details of final refinement as well as the bond lengths and angle are summarized in Tables S1, S2, S3 and S4 and the numbering scheme employed is also shown in Figures S7, S8, S9 and S10 which were drawn with ORTEP at 50% probability ellipsoids. CCDC 2026301 (**2**), 2026302 (**3**), 2026303 (**4**) and 2026304 (**5**) contain the supplementary crystallographic data for this paper.

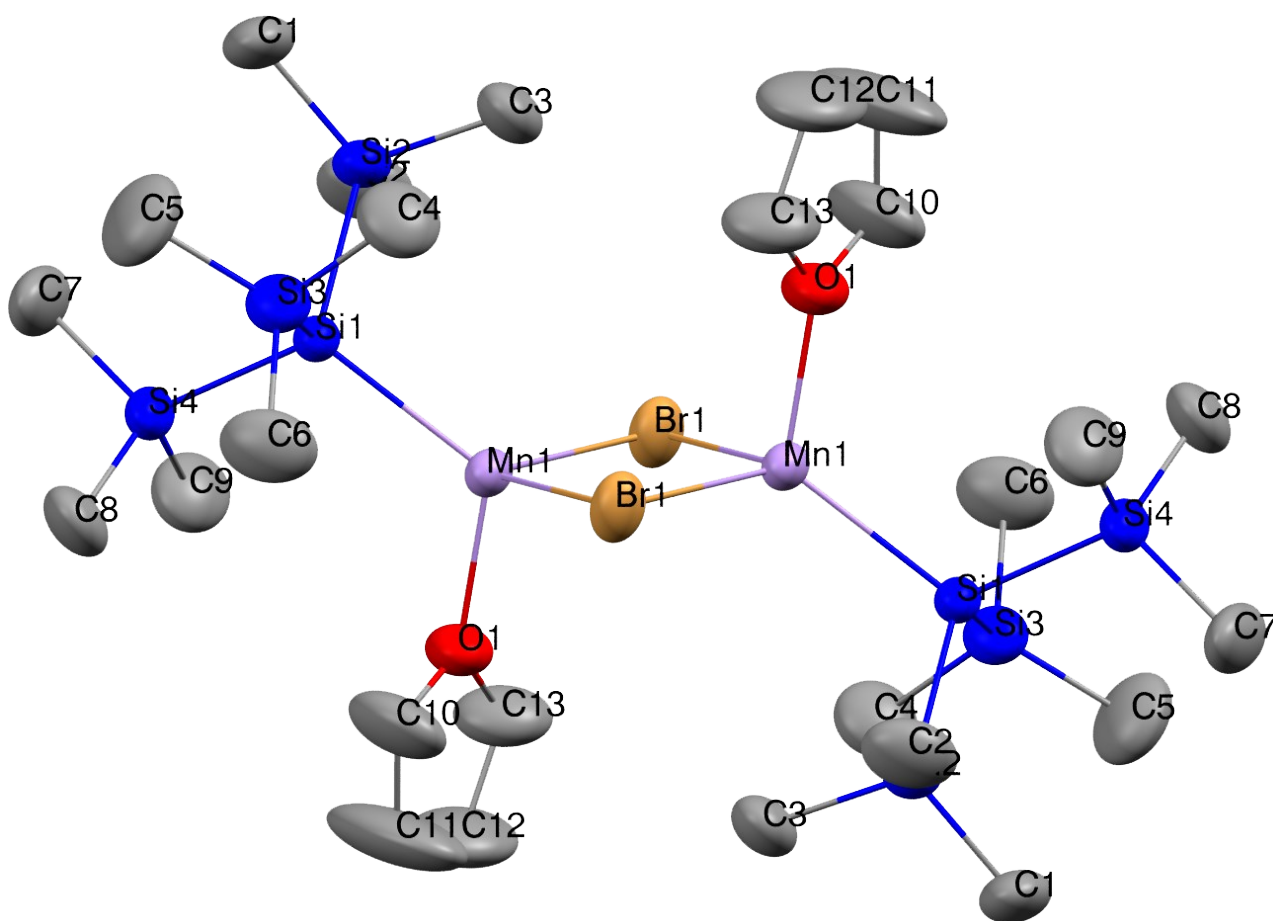

**Figure S7.** ORTEP drawing of **2** (50% probability of the thermal ellipsoids)

**Table S1-1.** Crystal data and structure refinement for **2**.

|                                       |                                                                                                                                                |
|---------------------------------------|------------------------------------------------------------------------------------------------------------------------------------------------|
| Empirical Formula                     | C <sub>26</sub> H <sub>70</sub> Br <sub>2</sub> Mn <sub>2</sub> O <sub>2</sub> Si <sub>8</sub>                                                 |
| Formula Weight                        | 909.21                                                                                                                                         |
| Crystal Color, Habit                  | colorless, block                                                                                                                               |
| Crystal Dimensions                    | 0.200 X 0.150 X 0.150 mm                                                                                                                       |
| Crystal System                        | triclinic                                                                                                                                      |
| Lattice Type                          | Primitive                                                                                                                                      |
| Lattice Parameters                    | a = 9.482(4) Å<br>b = 10.595(4) Å<br>c = 13.023(5) Å<br>α = 90.848(4) °<br>β = 107.188(5) °<br>γ = 96.065(5) °<br>V = 1241.4(8) Å <sup>3</sup> |
| Space Group                           | P-1 (#2)                                                                                                                                       |
| Z value                               | 1                                                                                                                                              |
| D <sub>calc</sub>                     | 1.216 g/cm <sup>3</sup>                                                                                                                        |
| F <sub>000</sub>                      | 474.00                                                                                                                                         |
| μ(MoKα)                               | 23.347 cm <sup>-1</sup>                                                                                                                        |
| Diffractionmeter                      | Saturn724                                                                                                                                      |
| Radiation                             | MoKα (λ = 0.71075 Å)<br>multi-layer mirror monochromated                                                                                       |
| Voltage, Current                      | 50kV, 24mA                                                                                                                                     |
| Temperature                           | -60.0°C                                                                                                                                        |
| Detector Aperture                     | 72.8 x 72.8 mm                                                                                                                                 |
| Data Images                           | 2880 exposures                                                                                                                                 |
| ω oscillation Range (χ=45.0, φ=0.0)   | -70.0 - 110.0°                                                                                                                                 |
| Exposure Rate                         | 4.0 sec./°                                                                                                                                     |
| Detector Swing Angle                  | 19.89°                                                                                                                                         |
| ω oscillation Range (χ=45.0, φ=90.0)  | -70.0 - 110.0°                                                                                                                                 |
| Exposure Rate                         | 4.0 sec./°                                                                                                                                     |
| Detector Swing Angle                  | 19.89°                                                                                                                                         |
| ω oscillation Range (χ=45.0, φ=180.0) | -70.0 - 110.0°                                                                                                                                 |
| Exposure Rate                         | 4.0 sec./°                                                                                                                                     |
| Detector Swing Angle                  | 19.89°                                                                                                                                         |
| ω oscillation Range (χ=45.0, φ=270.0) | -70.0 - 110.0°                                                                                                                                 |
| Exposure Rate                         | 4.0 sec./°                                                                                                                                     |
| Detector Swing Angle                  | 19.89°                                                                                                                                         |

|                                          |                                                                                                                      |
|------------------------------------------|----------------------------------------------------------------------------------------------------------------------|
| Detector Position                        | 44.68 mm                                                                                                             |
| Pixel Size                               | 0.141 mm                                                                                                             |
| $2\theta_{\max}$                         | 55.1°                                                                                                                |
| No. of Reflections Measured              | Total: 16571<br>Unique: 5517 ( $R_{\text{int}} = 0.1137$ )                                                           |
| Corrections                              | Lorentz-polarization<br>Absorption<br>(trans. factors: 0.562 - 0.705)                                                |
| Structure Solution                       | Direct Methods (SHELXT Version 2014/5)                                                                               |
| Refinement                               | Full-matrix least-squares on $F^2$                                                                                   |
| Function Minimized                       | $\Sigma w (F_o^2 - F_c^2)^2$                                                                                         |
| Least Squares Weights                    | $w = 1 / [ \sigma^2(F_o^2) + (0.0396 \cdot P)^2 + 0.7005 \cdot P ]$<br>where $P = (\text{Max}(F_o^2, 0) + 2F_c^2)/3$ |
| $2\theta_{\max}$ cutoff                  | 55.1°                                                                                                                |
| Anomalous Dispersion                     | All non-hydrogen atoms                                                                                               |
| No. Observations (All reflections)       | 5517                                                                                                                 |
| No. Variables                            | 181                                                                                                                  |
| Reflection/Parameter Ratio               | 30.48                                                                                                                |
| Residuals: $R_1$ ( $I > 2.00\sigma(I)$ ) | 0.0485                                                                                                               |
| Residuals: $R$ (All reflections)         | 0.0548                                                                                                               |
| Residuals: $wR_2$ (All reflections)      | 0.1263                                                                                                               |
| Goodness of Fit Indicator                | 1.071                                                                                                                |
| Max Shift/Error in Final Cycle           | 0.000                                                                                                                |
| Maximum peak in Final Diff. Map          | 0.70 e <sup>-</sup> /Å <sup>3</sup>                                                                                  |
| Minimum peak in Final Diff. Map          | -0.62 e <sup>-</sup> /Å <sup>3</sup>                                                                                 |

**Table S1-2.** Atomic coordinates and  $B_{\text{iso}}/B_{\text{eq}}$  and occupancy

| atom | x           | y          | z           | $B_{\text{eq}}$ |
|------|-------------|------------|-------------|-----------------|
| Br1  | 0.34727(3)  | 0.10070(3) | 0.42660(2)  | 4.210(10)       |
| Mn1  | 0.60006(5)  | 0.13430(4) | 0.57317(3)  | 3.032(10)       |
| Si1  | 0.63421(8)  | 0.25071(6) | 0.75058(5)  | 2.709(13)       |
| Si2  | 0.40014(9)  | 0.26902(8) | 0.76981(7)  | 3.661(16)       |
| Si3  | 0.76674(10) | 0.13450(9) | 0.89020(7)  | 4.104(17)       |
| Si4  | 0.75857(10) | 0.45538(8) | 0.76239(7)  | 3.879(17)       |
| O1   | 0.7368(3)   | 0.1991(3)  | 0.47801(19) | 5.01(5)         |
| C1   | 0.4034(5)   | 0.3192(5)  | 0.9089(4)   | 6.45(10)        |
| C2   | 0.3067(5)   | 0.3874(5)  | 0.6747(4)   | 6.91(11)        |
| C3   | 0.2786(5)   | 0.1142(4)  | 0.7335(4)   | 5.89(9)         |
| C4   | 0.6563(5)   | -0.0185(4) | 0.8997(4)   | 6.37(10)        |
| C5   | 0.8199(7)   | 0.2203(6)  | 1.0249(3)   | 7.90(13)        |
| C6   | 0.9393(5)   | 0.0948(5)  | 0.8610(4)   | 7.05(11)        |
| C7   | 0.7256(7)   | 0.5650(4)  | 0.8648(5)   | 7.74(14)        |
| C8   | 0.9647(5)   | 0.4508(5)  | 0.7977(4)   | 6.88(11)        |
| C9   | 0.6990(6)   | 0.5284(4)  | 0.6286(4)   | 6.90(11)        |
| C10  | 0.8961(5)   | 0.1949(7)  | 0.5149(5)   | 9.29(18)        |
| C11  | 0.9488(8)   | 0.2434(13) | 0.4286(7)   | 16.8(5)         |
| C12  | 0.8318(9)   | 0.2650(7)  | 0.3399(6)   | 10.5(2)         |
| C13  | 0.6929(6)   | 0.2379(5)  | 0.3707(4)   | 7.09(11)        |

$$B_{\text{eq}} = 8/3 \pi^2 (U_{11}(aa^*)^2 + U_{22}(bb^*)^2 + U_{33}(cc^*)^2 + 2U_{12}(aa^*bb^*)\cos \gamma + 2U_{13}(aa^*cc^*)\cos \beta + 2U_{23}(bb^*cc^*)\cos \alpha)$$

**Table S1-3.** Anisotropic displacement parameters

| atom | $U_{11}$   | $U_{22}$    | $U_{33}$   | $U_{12}$    | $U_{13}$    | $U_{23}$     |
|------|------------|-------------|------------|-------------|-------------|--------------|
| Br1  | 0.0551(2)  | 0.04282(17) | 0.0560(2)  | 0.01674(13) | 0.00385(13) | -0.00616(12) |
| Mn1  | 0.0448(2)  | 0.0348(2)   | 0.0377(2)  | 0.00067(16) | 0.01709(16) | -0.00367(15) |
| Si1  | 0.0368(4)  | 0.0334(3)   | 0.0337(3)  | 0.0010(3)   | 0.0132(3)   | -0.0009(3)   |
| Si2  | 0.0446(4)  | 0.0488(4)   | 0.0525(5)  | 0.0047(3)   | 0.0254(3)   | -0.0016(3)   |
| Si3  | 0.0538(5)  | 0.0613(5)   | 0.0409(4)  | 0.0103(4)   | 0.0125(3)   | 0.0129(4)    |
| Si4  | 0.0593(5)  | 0.0387(4)   | 0.0519(5)  | -0.0104(4)  | 0.0266(4)   | -0.0084(3)   |
| O1   | 0.0620(14) | 0.0787(16)  | 0.0555(13) | -0.0065(12) | 0.0315(11)  | 0.0036(11)   |
| C1   | 0.083(3)   | 0.097(3)    | 0.080(3)   | -0.004(2)   | 0.053(2)    | -0.021(2)    |
| C2   | 0.066(3)   | 0.097(3)    | 0.116(4)   | 0.039(2)    | 0.041(2)    | 0.032(3)     |
| C3   | 0.056(2)   | 0.078(3)    | 0.092(3)   | -0.0151(19) | 0.0347(19)  | -0.009(2)    |
| C4   | 0.096(3)   | 0.069(2)    | 0.081(3)   | 0.011(2)    | 0.029(2)    | 0.035(2)     |
| C5   | 0.123(4)   | 0.120(4)    | 0.042(2)   | 0.022(3)    | -0.001(2)   | -0.001(2)    |
| C6   | 0.068(3)   | 0.119(4)    | 0.089(3)   | 0.038(3)    | 0.023(2)    | 0.044(3)     |

|     |          |           |          |           |          |           |
|-----|----------|-----------|----------|-----------|----------|-----------|
| C7  | 0.129(4) | 0.066(2)  | 0.113(4) | -0.028(3) | 0.071(3) | -0.044(3) |
| C8  | 0.062(2) | 0.086(3)  | 0.110(3) | -0.027(2) | 0.034(2) | -0.016(3) |
| C9  | 0.118(4) | 0.058(2)  | 0.089(3) | -0.001(2) | 0.039(3) | 0.023(2)  |
| C10 | 0.054(3) | 0.192(7)  | 0.105(4) | -0.016(3) | 0.031(2) | 0.026(4)  |
| C11 | 0.093(5) | 0.412(18) | 0.142(7) | -0.035(8) | 0.069(5) | 0.070(9)  |
| C12 | 0.156(7) | 0.150(6)  | 0.130(6) | -0.004(5) | 0.105(5) | 0.039(4)  |
| C13 | 0.101(4) | 0.104(3)  | 0.087(3) | 0.028(3)  | 0.056(3) | 0.046(3)  |

The general temperature factor expression:  $\exp(-2\pi^2(a^2U_{11}h^2 + b^2U_{22}k^2 + c^2U_{33}l^2 + 2a*b*U_{12}hk + 2a*c*U_{13}hl + 2b*c*U_{23}kl))$

**Table S1-4.** Bond lengths (Å)

| atom | atom | distance   | atom | atom             | distance   |
|------|------|------------|------|------------------|------------|
| Br1  | Mn1  | 2.5711(9)  | Br1  | Mn1 <sup>1</sup> | 2.5905(10) |
| Mn1  | Si1  | 2.5205(11) | Mn1  | O1               | 2.116(3)   |
| Si1  | Si2  | 2.3332(15) | Si1  | Si3              | 2.3332(12) |
| Si1  | Si4  | 2.3365(13) | Si2  | C1               | 1.870(5)   |
| Si2  | C2   | 1.877(5)   | Si2  | C3               | 1.871(4)   |
| Si3  | C4   | 1.861(5)   | Si3  | C5               | 1.868(5)   |
| Si3  | C6   | 1.873(5)   | Si4  | C7               | 1.871(6)   |
| Si4  | C8   | 1.877(4)   | Si4  | C9               | 1.872(5)   |
| O1   | C10  | 1.448(5)   | O1   | C13              | 1.416(6)   |
| C10  | C11  | 1.439(12)  | C11  | C12              | 1.386(11)  |
| C12  | C13  | 1.487(11)  |      |                  |            |

Symmetry Operators:

(1) -X+1,-Y,-Z+1

**Table S1-5.** Bond angles (°)

| atom             | atom | atom             | angle      | atom             | atom | atom             | angle      |
|------------------|------|------------------|------------|------------------|------|------------------|------------|
| Mn1              | Br1  | Mn1 <sup>1</sup> | 83.841(19) | Br1              | Mn1  | Br1 <sup>1</sup> | 96.159(19) |
| Br1              | Mn1  | Si1              | 122.00(3)  | Br1              | Mn1  | O1               | 99.50(7)   |
| Br1 <sup>1</sup> | Mn1  | Si1              | 118.73(2)  | Br1 <sup>1</sup> | Mn1  | O1               | 96.54(8)   |
| Si1              | Mn1  | O1               | 118.65(7)  | Mn1              | Si1  | Si2              | 108.46(3)  |
| Mn1              | Si1  | Si3              | 109.31(4)  | Mn1              | Si1  | Si4              | 112.85(4)  |
| Si2              | Si1  | Si3              | 109.17(5)  | Si2              | Si1  | Si4              | 107.82(5)  |
| Si3              | Si1  | Si4              | 109.16(4)  | Si1              | Si2  | C1               | 114.21(15) |
| Si1              | Si2  | C2               | 109.52(18) | Si1              | Si2  | C3               | 110.70(16) |
| C1               | Si2  | C2               | 108.2(2)   | C1               | Si2  | C3               | 107.1(2)   |
| C2               | Si2  | C3               | 106.85(19) | Si1              | Si3  | C4               | 110.88(14) |
| Si1              | Si3  | C5               | 113.45(19) | Si1              | Si3  | C6               | 108.94(17) |
| C4               | Si3  | C5               | 107.3(2)   | C4               | Si3  | C6               | 107.2(2)   |

|     |     |     |            |     |     |     |            |
|-----|-----|-----|------------|-----|-----|-----|------------|
| C5  | Si3 | C6  | 108.9(2)   | Si1 | Si4 | C7  | 114.12(18) |
| Si1 | Si4 | C8  | 110.91(16) | Si1 | Si4 | C9  | 109.56(14) |
| C7  | Si4 | C8  | 107.1(2)   | C7  | Si4 | C9  | 107.9(2)   |
| C8  | Si4 | C9  | 107.0(3)   | Mn1 | O1  | C10 | 121.3(3)   |
| Mn1 | O1  | C13 | 128.2(3)   | C10 | O1  | C13 | 110.1(4)   |
| O1  | C10 | C11 | 105.0(5)   | C10 | C11 | C12 | 111.3(7)   |
| C11 | C12 | C13 | 107.1(7)   | O1  | C13 | C12 | 106.2(4)   |

Symmetry Operators:

(1) -X+1,-Y,-Z+1

**Table S1-6.** Torsion Angles(°)

(Those having bond angles > 160 or < 20 degrees are excluded.)

| atom1            | atom2 | atom3            | atom4            | angle      | atom1            | atom2 | atom3            | atom4            | angle       |
|------------------|-------|------------------|------------------|------------|------------------|-------|------------------|------------------|-------------|
| Mn1              | Br1   | Mn1 <sup>1</sup> | Br1 <sup>1</sup> | -0.000(17) | Mn1              | Br1   | Mn1 <sup>1</sup> | Si1 <sup>1</sup> | -131.84(3)  |
| Mn1              | Br1   | Mn1 <sup>1</sup> | O1 <sup>1</sup>  | 100.34(3)  | Mn1 <sup>1</sup> | Br1   | Mn1              | Br1 <sup>1</sup> | 0.000(16)   |
| Mn1 <sup>1</sup> | Br1   | Mn1              | Si1              | -129.61(2) | Mn1 <sup>1</sup> | Br1   | Mn1              | O1               | 97.72(2)    |
| Br1              | Mn1   | Si1              | Si2              | 14.26(4)   | Br1              | Mn1   | Si1              | Si3              | 133.19(3)   |
| Br1              | Mn1   | Si1              | Si4              | -105.14(4) | Br1              | Mn1   | O1               | C10              | -160.64(16) |
| Br1              | Mn1   | O1               | C13              | 12.1(2)    | Br1 <sup>1</sup> | Mn1   | Si1              | Si2              | -104.88(3)  |
| Br1 <sup>1</sup> | Mn1   | Si1              | Si3              | 14.06(4)   | Br1 <sup>1</sup> | Mn1   | Si1              | Si4              | 135.73(3)   |
| Br1 <sup>1</sup> | Mn1   | O1               | C10              | -63.24(17) | Br1 <sup>1</sup> | Mn1   | O1               | C13              | 109.5(2)    |
| Si1              | Mn1   | O1               | C10              | 64.6(2)    | Si1              | Mn1   | O1               | C13              | -122.67(18) |
| O1               | Mn1   | Si1              | Si2              | 138.54(9)  | O1               | Mn1   | Si1              | Si3              | -102.52(9)  |
| O1               | Mn1   | Si1              | Si4              | 19.15(9)   | Mn1              | Si1   | Si2              | C1               | 166.75(4)   |
| Mn1              | Si1   | Si2              | C2               | -71.73(5)  | Mn1              | Si1   | Si2              | C3               | 45.84(5)    |
| Mn1              | Si1   | Si3              | C4               | -66.38(6)  | Mn1              | Si1   | Si3              | C5               | 172.84(4)   |
| Mn1              | Si1   | Si3              | C6               | 51.35(5)   | Mn1              | Si1   | Si4              | C7               | 158.30(4)   |
| Mn1              | Si1   | Si4              | C8               | -80.68(5)  | Mn1              | Si1   | Si4              | C9               | 37.21(6)    |
| Si2              | Si1   | Si3              | C4               | 52.11(6)   | Si2              | Si1   | Si3              | C5               | -68.67(6)   |
| Si2              | Si1   | Si3              | C6               | 169.84(4)  | Si3              | Si1   | Si2              | C1               | 47.73(6)    |
| Si3              | Si1   | Si2              | C2               | 169.25(4)  | Si3              | Si1   | Si2              | C3               | -73.18(5)   |
| Si2              | Si1   | Si4              | C7               | 38.54(5)   | Si2              | Si1   | Si4              | C8               | 159.56(4)   |
| Si2              | Si1   | Si4              | C9               | -82.55(6)  | Si4              | Si1   | Si2              | C1               | -70.75(5)   |
| Si4              | Si1   | Si2              | C2               | 50.78(5)   | Si4              | Si1   | Si2              | C3               | 168.35(4)   |
| Si3              | Si1   | Si4              | C7               | -79.94(6)  | Si3              | Si1   | Si4              | C8               | 41.07(6)    |
| Si3              | Si1   | Si4              | C9               | 158.97(5)  | Si4              | Si1   | Si3              | C4               | 169.74(5)   |
| Si4              | Si1   | Si3              | C5               | 48.97(7)   | Si4              | Si1   | Si3              | C6               | -72.53(6)   |
| Mn1              | O1    | C10              | C11              | 178.7(2)   | Mn1              | O1    | C13              | C12              | -175.91(19) |
| C10              | O1    | C13              | C12              | -2.6(5)    | C13              | O1    | C10              | C11              | 4.8(6)      |

|     |     |     |     |          |     |     |     |     |         |
|-----|-----|-----|-----|----------|-----|-----|-----|-----|---------|
| O1  | C10 | C11 | C12 | -5.4(11) | C10 | C11 | C12 | C13 | 4.0(11) |
| C11 | C12 | C13 | O1  | -0.8(9)  |     |     |     |     |         |

Symmetry Operators:

(1)  $-X+1,-Y,-Z+1$



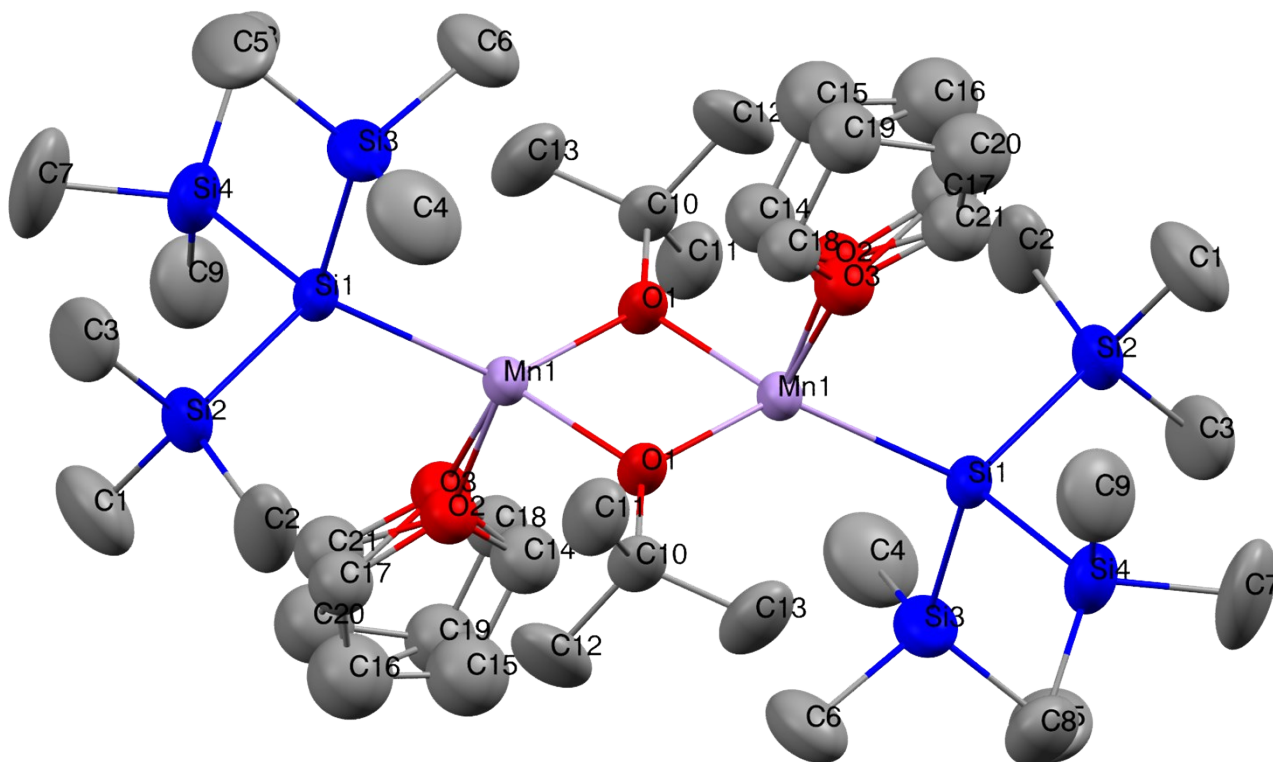

**Figure S8.** ORTEP drawing of **3** (50% probability of the thermal ellipsoids). The site occupancy factor for the oxygen and carbon atoms derived from the coordinated THF moieties were defined as 0.5. For details, the site occupancy factor was defined as follows: 0.5 for O2, O3, C14, C15, C16, C17, C18, C19, C20 and C21, respectively.

**Table S2-1.** Crystal data and structure refinement for **3**.

|                                       |                                                                                                                                               |
|---------------------------------------|-----------------------------------------------------------------------------------------------------------------------------------------------|
| Empirical Formula                     | C <sub>34</sub> H <sub>88</sub> Mn <sub>2</sub> O <sub>4</sub> Si <sub>8</sub>                                                                |
| Formula Weight                        | 895.63                                                                                                                                        |
| Crystal Color, Habit                  | colorless, platelet                                                                                                                           |
| Crystal Dimensions                    | 0.100 X 0.050 X 0.020 mm                                                                                                                      |
| Crystal System                        | triclinic                                                                                                                                     |
| Lattice Type                          | Primitive                                                                                                                                     |
| Lattice Parameters                    | a = 9.820(4) Å<br>b = 9.922(4) Å<br>c = 14.623(5) Å<br>α = 97.082(5) °<br>β = 98.990(4) °<br>γ = 100.713(6) °<br>V = 1365.6(9) Å <sup>3</sup> |
| Space Group                           | P-1 (#2)                                                                                                                                      |
| Z value                               | 1                                                                                                                                             |
| D <sub>calc</sub>                     | 1.089 g/cm <sup>3</sup>                                                                                                                       |
| F <sub>000</sub>                      | 486.00                                                                                                                                        |
| μ(MoKα)                               | 6.657 cm <sup>-1</sup>                                                                                                                        |
| Diffractometer                        | Saturn724                                                                                                                                     |
| Radiation                             | MoKα (λ = 0.71075 Å)<br>multi-layer mirror monochromated                                                                                      |
| Voltage, Current                      | 50kV, 24mA                                                                                                                                    |
| Temperature                           | -30.0°C                                                                                                                                       |
| Detector Aperture                     | 72.8 x 72.8 mm                                                                                                                                |
| Data Images                           | 2880 exposures                                                                                                                                |
| ω oscillation Range (χ=45.0, φ=0.0)   | -70.0 - 110.0°                                                                                                                                |
| Exposure Rate                         | 64.0 sec./°                                                                                                                                   |
| Detector Swing Angle                  | 19.88°                                                                                                                                        |
| ω oscillation Range (χ=45.0, φ=90.0)  | -70.0 - 110.0°                                                                                                                                |
| Exposure Rate                         | 64.0 sec./°                                                                                                                                   |
| Detector Swing Angle                  | 19.88°                                                                                                                                        |
| ω oscillation Range (χ=45.0, φ=180.0) | -70.0 - 110.0°                                                                                                                                |
| Exposure Rate                         | 64.0 sec./°                                                                                                                                   |
| Detector Swing Angle                  | 19.88°                                                                                                                                        |
| ω oscillation Range (χ=45.0, φ=270.0) | -70.0 - 110.0°                                                                                                                                |
| Exposure Rate                         | 64.0 sec./°                                                                                                                                   |
| Detector Swing Angle                  | 19.88°                                                                                                                                        |
| Detector Position                     | 44.64 mm                                                                                                                                      |

|                                       |                                                                                                                      |
|---------------------------------------|----------------------------------------------------------------------------------------------------------------------|
| Pixel Size                            | 0.141 mm                                                                                                             |
| $2\theta_{\max}$                      | 54.9°                                                                                                                |
| No. of Reflections Measured           | Total: 21717<br>Unique: 6162 ( $R_{\text{int}} = 0.1579$ )                                                           |
| Corrections                           | Lorentz-polarization<br>Absorption<br>(trans. factors: 0.844 - 0.987)                                                |
| Structure Solution                    | Direct Methods (SHELXT Version 2014/5)                                                                               |
| Refinement                            | Full-matrix least-squares on $F^2$                                                                                   |
| Function Minimized                    | $\Sigma w (F_o^2 - F_c^2)^2$                                                                                         |
| Least Squares Weights                 | $w = 1 / [ \sigma^2(F_o^2) + (0.0525 \cdot P)^2 + 3.1899 \cdot P ]$<br>where $P = (\text{Max}(F_o^2, 0) + 2F_c^2)/3$ |
| $2\theta_{\max}$ cutoff               | 54.9°                                                                                                                |
| Anomalous Dispersion                  | All non-hydrogen atoms                                                                                               |
| No. Observations (All reflections)    | 6162                                                                                                                 |
| No. Variables                         | 212                                                                                                                  |
| Reflection/Parameter Ratio            | 29.07                                                                                                                |
| Residuals: R1 ( $I > 2.00\sigma(I)$ ) | 0.0772                                                                                                               |
| Residuals: R (All reflections)        | 0.0826                                                                                                               |
| Residuals: wR2 (All reflections)      | 0.2153                                                                                                               |
| Goodness of Fit Indicator             | 1.073                                                                                                                |
| Max Shift/Error in Final Cycle        | 0.000                                                                                                                |
| Maximum peak in Final Diff. Map       | 0.73 e <sup>-</sup> /Å <sup>3</sup>                                                                                  |
| Minimum peak in Final Diff. Map       | -0.66 e <sup>-</sup> /Å <sup>3</sup>                                                                                 |

**Table S2-2.** Atomic coordinates and  $B_{\text{iso}}/B_{\text{eq}}$ 

| atom | x           | y           | z           | $B_{\text{eq}}$ | occ |
|------|-------------|-------------|-------------|-----------------|-----|
| Mn1  | 0.45665(6)  | 0.46433(6)  | 0.39015(4)  | 2.739(14)       | 1   |
| Si1  | 0.31154(11) | 0.30228(11) | 0.24009(7)  | 2.89(2)         | 1   |
| Si2  | 0.43094(15) | 0.19268(16) | 0.13450(9)  | 4.43(3)         | 1   |
| Si3  | 0.15916(15) | 0.11559(14) | 0.27845(11) | 4.36(3)         | 1   |
| Si4  | 0.16035(16) | 0.40831(16) | 0.14413(9)  | 4.60(3)         | 1   |
| O1   | 0.4010(3)   | 0.5720(3)   | 0.50178(19) | 3.20(5)         | 1   |
| O2   | 0.5950(8)   | 0.6276(8)   | 0.3418(6)   | 3.69(15)        | 1/2 |
| O3   | 0.5635(9)   | 0.6486(9)   | 0.3356(6)   | 4.06(17)        | 1/2 |
| C1   | 0.5097(10)  | 0.3105(9)   | 0.0584(6)   | 8.6(2)          | 1   |
| C2   | 0.5829(8)   | 0.1275(9)   | 0.1951(5)   | 7.7(2)          | 1   |
| C3   | 0.3151(8)   | 0.0386(7)   | 0.0542(5)   | 7.17(17)        | 1   |
| C4   | 0.2579(10)  | -0.0160(7)  | 0.3212(7)   | 8.1(2)          | 1   |
| C5   | 0.0125(8)   | 0.0198(9)   | 0.1802(6)   | 8.8(2)          | 1   |
| C6   | 0.0689(8)   | 0.1741(7)   | 0.3759(5)   | 6.93(16)        | 1   |
| C7   | 0.1055(10)  | 0.3161(10)  | 0.0203(5)   | 9.3(3)          | 1   |
| C8   | -0.0076(6)  | 0.4190(8)   | 0.1867(5)   | 6.58(15)        | 1   |
| C9   | 0.2508(8)   | 0.5928(7)   | 0.1381(5)   | 7.30(17)        | 1   |
| C10  | 0.2875(5)   | 0.6420(5)   | 0.5078(3)   | 3.86(8)         | 1   |
| C11  | 0.3476(7)   | 0.7957(6)   | 0.5395(4)   | 5.64(12)        | 1   |
| C12  | 0.2034(7)   | 0.5817(8)   | 0.5784(5)   | 6.64(16)        | 1   |
| C13  | 0.1935(6)   | 0.6170(7)   | 0.4131(5)   | 6.03(14)        | 1   |
| C14  | 0.6609(15)  | 0.7675(14)  | 0.4015(10)  | 5.5(3)          | 1/2 |
| C15  | 0.781(2)    | 0.8167(19)  | 0.3529(14)  | 7.8(4)          | 1/2 |
| C16  | 0.756(2)    | 0.7367(19)  | 0.2587(14)  | 8.3(4)          | 1/2 |
| C17  | 0.6473(14)  | 0.6081(13)  | 0.2535(9)   | 4.7(2)          | 1/2 |
| C18  | 0.6142(13)  | 0.7811(12)  | 0.3790(8)   | 4.40(19)        | 1/2 |
| C19  | 0.7313(15)  | 0.8456(14)  | 0.3316(10)  | 5.8(3)          | 1/2 |
| C20  | 0.6831(18)  | 0.7591(17)  | 0.2310(12)  | 7.2(3)          | 1/2 |
| C21  | 0.6053(15)  | 0.6323(14)  | 0.2446(10)  | 5.4(3)          | 1/2 |

$$B_{\text{eq}} = \frac{8}{3} \pi^2 (U_{11}(aa^*)^2 + U_{22}(bb^*)^2 + U_{33}(cc^*)^2 + 2U_{12}(aa^*bb^*)\cos \gamma + 2U_{13}(aa^*cc^*)\cos \beta + 2U_{23}(bb^*cc^*)\cos \alpha)$$

**Table S2-3.** Anisotropic displacement parameters

| atom | $U_{11}$  | $U_{22}$  | $U_{33}$  | $U_{12}$   | $U_{13}$  | $U_{23}$   |
|------|-----------|-----------|-----------|------------|-----------|------------|
| Mn1  | 0.0349(3) | 0.0376(3) | 0.0302(3) | 0.0065(2)  | 0.0056(2) | 0.0021(2)  |
| Si1  | 0.0388(5) | 0.0392(5) | 0.0297(5) | 0.0086(4)  | 0.0032(4) | 0.0001(4)  |
| Si2  | 0.0611(8) | 0.0709(9) | 0.0371(6) | 0.0217(7)  | 0.0131(6) | -0.0057(6) |
| Si3  | 0.0585(8) | 0.0435(7) | 0.0584(8) | -0.0019(6) | 0.0152(6) | 0.0013(6)  |

|     |            |            |            |            |            |             |
|-----|------------|------------|------------|------------|------------|-------------|
| Si4 | 0.0639(8)  | 0.0709(9)  | 0.0408(7)  | 0.0273(7)  | -0.0033(6) | 0.0089(6)   |
| O1  | 0.0374(13) | 0.0499(16) | 0.0351(14) | 0.0201(12) | 0.0022(11) | -0.0010(12) |
| C1  | 0.134(7)   | 0.116(6)   | 0.085(5)   | 0.021(5)   | 0.062(5)   | 0.009(5)    |
| C2  | 0.106(5)   | 0.144(7)   | 0.056(3)   | 0.078(5)   | 0.013(3)   | -0.010(4)   |
| C3  | 0.103(5)   | 0.090(5)   | 0.069(4)   | 0.020(4)   | 0.021(4)   | -0.033(3)   |
| C4  | 0.139(7)   | 0.064(4)   | 0.126(7)   | 0.031(4)   | 0.047(6)   | 0.045(4)    |
| C5  | 0.083(5)   | 0.112(6)   | 0.101(6)   | -0.046(4)  | 0.015(4)   | -0.027(5)   |
| C6  | 0.092(5)   | 0.081(4)   | 0.094(5)   | 0.004(4)   | 0.049(4)   | 0.006(4)    |
| C7  | 0.146(7)   | 0.150(8)   | 0.055(4)   | 0.081(6)   | -0.032(4)  | -0.008(4)   |
| C8  | 0.060(3)   | 0.110(5)   | 0.079(4)   | 0.031(3)   | -0.006(3)  | 0.013(4)    |
| C9  | 0.120(6)   | 0.082(4)   | 0.088(5)   | 0.040(4)   | 0.012(4)   | 0.041(4)    |
| C10 | 0.043(2)   | 0.057(3)   | 0.050(2)   | 0.0255(19) | 0.0061(18) | -0.002(2)   |
| C11 | 0.079(4)   | 0.067(3)   | 0.065(3)   | 0.031(3)   | 0.000(3)   | -0.010(3)   |
| C12 | 0.070(4)   | 0.117(5)   | 0.091(5)   | 0.049(4)   | 0.045(3)   | 0.032(4)    |
| C13 | 0.061(3)   | 0.080(4)   | 0.081(4)   | 0.037(3)   | -0.017(3)  | -0.008(3)   |

The general temperature factor expression:  $\exp(-2\pi^2(a^2U_{11}h^2 + b^2U_{22}k^2 + c^2U_{33}l^2 + 2a*b*U_{12}hk + 2a*c*U_{13}hl + 2b*c*U_{23}kl))$

**Table S2-4.** Bond lengths (Å)

| atom | atom            | distance   | atom | atom | distance  |
|------|-----------------|------------|------|------|-----------|
| Mn1  | Si1             | 2.5946(12) | Mn1  | O1   | 2.042(3)  |
| Mn1  | O1 <sup>1</sup> | 2.054(3)   | Mn1  | O2   | 2.177(8)  |
| Mn1  | O3              | 2.233(9)   | Si1  | Si2  | 2.359(2)  |
| Si1  | Si3             | 2.3394(19) | Si1  | Si4  | 2.361(2)  |
| Si2  | C1              | 1.860(9)   | Si2  | C2   | 1.875(8)  |
| Si2  | C3              | 1.872(6)   | Si3  | C4   | 1.876(9)  |
| Si3  | C5              | 1.884(7)   | Si3  | C6   | 1.880(8)  |
| Si4  | C7              | 1.873(7)   | Si4  | C8   | 1.867(7)  |
| Si4  | C9              | 1.899(7)   | O1   | C10  | 1.426(6)  |
| O2   | O3              | 0.409(13)  | O2   | C14  | 1.516(14) |
| O2   | C17             | 1.466(16)  | O2   | C18  | 1.519(14) |
| O2   | C21             | 1.445(17)  | O3   | C14  | 1.499(14) |
| O3   | C17             | 1.611(17)  | O3   | C18  | 1.353(13) |
| O3   | C21             | 1.452(18)  | C10  | C11  | 1.515(7)  |
| C10  | C12             | 1.528(9)   | C10  | C13  | 1.505(7)  |
| C14  | C15             | 1.51(3)    | C14  | C18  | 0.569(19) |
| C14  | C19             | 1.53(2)    | C15  | C16  | 1.46(3)   |
| C15  | C18             | 1.73(2)    | C15  | C19  | 0.67(3)   |
| C15  | C20             | 1.85(2)    | C16  | C17  | 1.49(2)   |
| C16  | C19             | 1.50(2)    | C16  | C20  | 0.84(3)   |

|     |     |         |     |     |         |
|-----|-----|---------|-----|-----|---------|
| C16 | C21 | 1.61(2) | C17 | C20 | 1.56(2) |
| C17 | C21 | 0.52(2) | C18 | C19 | 1.52(2) |
| C19 | C20 | 1.56(2) | C20 | C21 | 1.40(2) |

Symmetry Operators:

(1) -X+1,-Y+1,-Z+1

**Table S2-5.** Bond angles ( $^{\circ}$ )

| atom             | atom | atom             | angle      | atom            | atom | atom            | angle     |
|------------------|------|------------------|------------|-----------------|------|-----------------|-----------|
| Si1              | Mn1  | O1               | 132.98(8)  | Si1             | Mn1  | O1 <sup>1</sup> | 131.21(9) |
| Si1              | Mn1  | O2               | 105.9(2)   | Si1             | Mn1  | O3              | 103.7(2)  |
| O1               | Mn1  | O1 <sup>1</sup>  | 79.58(12)  | O1              | Mn1  | O2              | 101.8(2)  |
| O1               | Mn1  | O3               | 96.8(2)    | O1 <sup>1</sup> | Mn1  | O2              | 98.5(2)   |
| O1 <sup>1</sup>  | Mn1  | O3               | 106.9(2)   | O2              | Mn1  | O3              | 10.6(3)   |
| Mn1              | Si1  | Si2              | 119.20(6)  | Mn1             | Si1  | Si3             | 110.88(6) |
| Mn1              | Si1  | Si4              | 114.32(6)  | Si2             | Si1  | Si3             | 103.05(7) |
| Si2              | Si1  | Si4              | 103.88(7)  | Si3             | Si1  | Si4             | 103.87(7) |
| Si1              | Si2  | C1               | 113.1(3)   | Si1             | Si2  | C2              | 112.9(2)  |
| Si1              | Si2  | C3               | 113.2(3)   | C1              | Si2  | C2              | 104.7(4)  |
| C1               | Si2  | C3               | 106.5(3)   | C2              | Si2  | C3              | 105.8(3)  |
| Si1              | Si3  | C4               | 111.1(3)   | Si1             | Si3  | C5              | 115.2(3)  |
| Si1              | Si3  | C6               | 111.4(2)   | C4              | Si3  | C5              | 107.0(4)  |
| C4               | Si3  | C6               | 106.3(4)   | C5              | Si3  | C6              | 105.3(3)  |
| Si1              | Si4  | C7               | 113.6(3)   | Si1             | Si4  | C8              | 113.5(2)  |
| Si1              | Si4  | C9               | 110.4(2)   | C7              | Si4  | C8              | 105.4(4)  |
| C7               | Si4  | C9               | 106.6(4)   | C8              | Si4  | C9              | 106.9(4)  |
| Mn1              | O1   | Mn1 <sup>1</sup> | 100.42(14) | Mn1             | O1   | C10             | 131.4(2)  |
| Mn1 <sup>1</sup> | O1   | C10              | 127.9(3)   | Mn1             | O2   | O3              | 92.6(17)  |
| Mn1              | O2   | C14              | 123.0(8)   | Mn1             | O2   | C17             | 123.5(6)  |
| Mn1              | O2   | C18              | 123.5(7)   | Mn1             | O2   | C21             | 124.4(6)  |
| O3               | O2   | C14              | 79.9(15)   | O3              | O2   | C17             | 103.4(19) |
| O3               | O2   | C18              | 58.8(14)   | O3              | O2   | C21             | 82.8(18)  |
| C14              | O2   | C17              | 113.1(9)   | C14             | O2   | C18             | 21.6(7)   |
| C14              | O2   | C21              | 110.7(9)   | C17             | O2   | C18             | 110.8(9)  |
| C17              | O2   | C21              | 20.6(8)    | C18             | O2   | C21             | 101.0(9)  |
| Mn1              | O3   | O2               | 76.8(16)   | Mn1             | O3   | C14             | 120.4(8)  |
| Mn1              | O3   | C17              | 113.2(6)   | Mn1             | O3   | C18             | 129.9(8)  |
| Mn1              | O3   | C21              | 120.4(7)   | O2              | O3   | C14             | 84.5(15)  |
| O2               | O3   | C17              | 62.3(17)   | O2              | O3   | C18             | 106.2(16) |
| O2               | O3   | C21              | 81.0(18)   | C14             | O3   | C17             | 106.2(9)  |

|     |     |     |           |     |     |     |           |
|-----|-----|-----|-----------|-----|-----|-----|-----------|
| C14 | O3  | C18 | 22.3(8)   | C14 | O3  | C21 | 111.3(9)  |
| C17 | O3  | C18 | 111.7(9)  | C17 | O3  | C21 | 18.7(8)   |
| C18 | O3  | C21 | 109.2(10) | O1  | C10 | C11 | 108.8(4)  |
| O1  | C10 | C12 | 108.4(5)  | O1  | C10 | C13 | 108.9(4)  |
| C11 | C10 | C12 | 110.7(5)  | C11 | C10 | C13 | 110.7(5)  |
| C12 | C10 | C13 | 109.3(4)  | O2  | C14 | O3  | 15.6(5)   |
| O2  | C14 | C15 | 101.0(12) | O2  | C14 | C18 | 79.6(16)  |
| O2  | C14 | C19 | 101.4(10) | O3  | C14 | C15 | 106.7(12) |
| O3  | C14 | C18 | 64.3(16)  | O3  | C14 | C19 | 100.2(10) |
| C15 | C14 | C18 | 103(2)    | C15 | C14 | C19 | 25.4(10)  |
| C18 | C14 | C19 | 78(2)     | C14 | C15 | C16 | 109.3(14) |
| C14 | C15 | C18 | 18.7(7)   | C14 | C15 | C19 | 79(2)     |
| C14 | C15 | C20 | 96.9(11)  | C16 | C15 | C18 | 100.2(12) |
| C16 | C15 | C19 | 80(2)     | C16 | C15 | C20 | 26.2(10)  |
| C18 | C15 | C19 | 61(2)     | C18 | C15 | C20 | 82.5(10)  |
| C19 | C15 | C20 | 54.4(19)  | C15 | C16 | C17 | 109.2(16) |
| C15 | C16 | C19 | 26.1(10)  | C15 | C16 | C20 | 104(2)    |
| C15 | C16 | C21 | 107.1(16) | C17 | C16 | C19 | 108.2(15) |
| C17 | C16 | C20 | 78.9(17)  | C17 | C16 | C21 | 18.9(8)   |
| C19 | C16 | C20 | 78.1(19)  | C19 | C16 | C21 | 97.9(14)  |
| C20 | C16 | C21 | 60.6(16)  | O2  | C17 | O3  | 14.3(5)   |
| O2  | C17 | C16 | 104.1(11) | O2  | C17 | C20 | 102.9(11) |
| O2  | C17 | C21 | 77(2)     | O3  | C17 | C16 | 103.0(11) |
| O3  | C17 | C20 | 94.4(10)  | O3  | C17 | C21 | 63(2)     |
| C16 | C17 | C20 | 32.0(10)  | C16 | C17 | C21 | 93(2)     |
| C20 | C17 | C21 | 62(2)     | O2  | C18 | O3  | 15.0(5)   |
| O2  | C18 | C14 | 78.8(18)  | O2  | C18 | C15 | 91.7(10)  |
| O2  | C18 | C19 | 101.9(10) | O3  | C18 | C14 | 93.4(19)  |
| O3  | C18 | C15 | 102.5(10) | O3  | C18 | C19 | 108.0(10) |
| C14 | C18 | C15 | 58(2)     | C14 | C18 | C19 | 81(2)     |
| C15 | C18 | C19 | 22.6(9)   | C14 | C19 | C15 | 76(2)     |
| C14 | C19 | C16 | 106.2(13) | C14 | C19 | C18 | 21.5(7)   |
| C14 | C19 | C20 | 109.7(11) | C15 | C19 | C16 | 74(2)     |
| C15 | C19 | C18 | 97(2)     | C15 | C19 | C20 | 105(2)    |
| C16 | C19 | C18 | 108.8(12) | C16 | C19 | C20 | 31.9(10)  |
| C18 | C19 | C20 | 100.3(10) | C15 | C20 | C16 | 50.0(17)  |
| C15 | C20 | C17 | 89.0(11)  | C15 | C20 | C19 | 20.4(9)   |
| C15 | C20 | C21 | 97.8(13)  | C16 | C20 | C17 | 69.1(17)  |
| C16 | C20 | C19 | 70.0(18)  | C16 | C20 | C21 | 88(2)     |

|     |     |     |           |     |     |     |           |
|-----|-----|-----|-----------|-----|-----|-----|-----------|
| C17 | C20 | C19 | 101.5(13) | C17 | C20 | C21 | 19.3(8)   |
| C19 | C20 | C21 | 104.5(14) | O2  | C21 | O3  | 16.2(5)   |
| O2  | C21 | C16 | 99.4(11)  | O2  | C21 | C17 | 82(2)     |
| O2  | C21 | C20 | 112.7(11) | O3  | C21 | C16 | 104.9(11) |
| O3  | C21 | C17 | 98(2)     | O3  | C21 | C20 | 109.4(12) |
| C16 | C21 | C17 | 68(2)     | C16 | C21 | C20 | 31.7(11)  |
| C17 | C21 | C20 | 98(2)     |     |     |     |           |

Symmetry Operators:

(1) -X+1,-Y+1,-Z+1

**Table S2-6.** Torsion Angles(<sup>o</sup>)

(Those having bond angles > 160 or < 20 degrees are excluded.)

| atom1           | atom2 | atom3           | atom4            | angle       | atom1           | atom2 | atom3           | atom4            | angle      |
|-----------------|-------|-----------------|------------------|-------------|-----------------|-------|-----------------|------------------|------------|
| Si1             | Mn1   | O1              | Mn1 <sup>1</sup> | 138.09(7)   | Si1             | Mn1   | O1              | C10              | -36.1(3)   |
| O1              | Mn1   | Si1             | Si2              | -176.87(12) | O1              | Mn1   | Si1             | Si3              | -57.53(14) |
| O1              | Mn1   | Si1             | Si4              | 59.48(14)   | Si1             | Mn1   | O1 <sup>1</sup> | Mn1 <sup>1</sup> | -139.49(8) |
| Si1             | Mn1   | O1 <sup>1</sup> | C10 <sup>1</sup> | 46.1(3)     | O1 <sup>1</sup> | Mn1   | Si1             | Si2              | -57.70(13) |
| O1 <sup>1</sup> | Mn1   | Si1             | Si3              | 61.64(13)   | O1 <sup>1</sup> | Mn1   | Si1             | Si4              | 178.64(11) |
| Si1             | Mn1   | O2              | O3               | 79.1(11)    | Si1             | Mn1   | O2              | C14              | 158.8(5)   |
| Si1             | Mn1   | O2              | C17              | -28.8(6)    | Si1             | Mn1   | O2              | C18              | 132.9(4)   |
| Si1             | Mn1   | O2              | C21              | -3.9(7)     | O2              | Mn1   | Si1             | Si2              | 59.3(2)    |
| O2              | Mn1   | Si1             | Si3              | 178.6(2)    | O2              | Mn1   | Si1             | Si4              | -64.4(2)   |
| Si1             | Mn1   | O3              | O2               | -103.6(11)  | Si1             | Mn1   | O3              | C14              | -179.1(5)  |
| Si1             | Mn1   | O3              | C17              | -51.9(4)    | Si1             | Mn1   | O3              | C18              | 156.2(6)   |
| Si1             | Mn1   | O3              | C21              | -32.5(6)    | O3              | Mn1   | Si1             | Si2              | 69.9(3)    |
| O3              | Mn1   | Si1             | Si3              | -170.7(3)   | O3              | Mn1   | Si1             | Si4              | -53.7(3)   |
| O1              | Mn1   | O1 <sup>1</sup> | Mn1 <sup>1</sup> | -0.00(11)   | O1              | Mn1   | O1 <sup>1</sup> | C10 <sup>1</sup> | -174.5(2)  |
| O1 <sup>1</sup> | Mn1   | O1              | Mn1 <sup>1</sup> | 0.00(11)    | O1 <sup>1</sup> | Mn1   | O1              | C10              | -174.2(2)  |
| O1              | Mn1   | O2              | O3               | -62.5(11)   | O1              | Mn1   | O2              | C14              | 17.1(6)    |
| O1              | Mn1   | O2              | C17              | -170.5(5)   | O1              | Mn1   | O2              | C18              | -8.8(5)    |
| O1              | Mn1   | O2              | C21              | -145.6(6)   | O2              | Mn1   | O1              | Mn1 <sup>1</sup> | -96.6(2)   |
| O2              | Mn1   | O1              | C10              | 89.2(3)     | O1              | Mn1   | O3              | O2               | 119.0(11)  |
| O1              | Mn1   | O3              | C14              | 43.6(6)     | O1              | Mn1   | O3              | C17              | 170.7(4)   |
| O1              | Mn1   | O3              | C18              | 18.8(7)     | O1              | Mn1   | O3              | C21              | -169.9(5)  |
| O3              | Mn1   | O1              | Mn1 <sup>1</sup> | -106.0(2)   | O3              | Mn1   | O1              | C10              | 79.8(3)    |
| O1 <sup>1</sup> | Mn1   | O2              | O3               | -143.5(10)  | O1 <sup>1</sup> | Mn1   | O2              | C14              | -63.9(6)   |
| O1 <sup>1</sup> | Mn1   | O2              | C17              | 108.5(5)    | O1 <sup>1</sup> | Mn1   | O2              | C18              | -89.8(5)   |
| O1 <sup>1</sup> | Mn1   | O2              | C21              | 133.4(6)    | O2              | Mn1   | O1 <sup>1</sup> | Mn1 <sup>1</sup> | 100.6(2)   |
| O2              | Mn1   | O1 <sup>1</sup> | C10 <sup>1</sup> | -73.9(3)    | O1 <sup>1</sup> | Mn1   | O3              | O2               | 37.9(12)   |



|                  |     |                 |                  |             |                  |     |                 |                  |            |
|------------------|-----|-----------------|------------------|-------------|------------------|-----|-----------------|------------------|------------|
| O1 <sup>1</sup>  | Mn1 | O3              | C14              | -37.6(6)    | O1 <sup>1</sup>  | Mn1 | O3              | C17              | 89.6(4)    |
| O1 <sup>1</sup>  | Mn1 | O3              | C18              | -62.4(7)    | O1 <sup>1</sup>  | Mn1 | O3              | C21              | 109.0(5)   |
| O3               | Mn1 | O1 <sup>1</sup> | Mn1 <sup>1</sup> | 94.0(3)     | O3               | Mn1 | O1 <sup>1</sup> | C10 <sup>1</sup> | -80.4(3)   |
| Mn1              | Si1 | Si2             | C1               | -77.98(8)   | Mn1              | Si1 | Si2             | C2               | 40.64(10)  |
| Mn1              | Si1 | Si2             | C3               | 160.82(6)   | Mn1              | Si1 | Si3             | C4               | -75.05(8)  |
| Mn1              | Si1 | Si3             | C5               | 163.09(6)   | Mn1              | Si1 | Si3             | C6               | 43.32(9)   |
| Mn1              | Si1 | Si4             | C7               | 159.95(6)   | Mn1              | Si1 | Si4             | C8               | -79.73(8)  |
| Mn1              | Si1 | Si4             | C9               | 40.26(9)    | Si2              | Si1 | Si3             | C4               | 53.59(9)   |
| Si2              | Si1 | Si3             | C5               | -68.28(9)   | Si2              | Si1 | Si3             | C6               | 171.96(7)  |
| Si3              | Si1 | Si2             | C1               | 158.75(7)   | Si3              | Si1 | Si2             | C2               | -82.63(8)  |
| Si3              | Si1 | Si2             | C3               | 37.54(9)    | Si2              | Si1 | Si4             | C7               | 28.41(9)   |
| Si2              | Si1 | Si4             | C8               | 148.73(7)   | Si2              | Si1 | Si4             | C9               | -91.28(8)  |
| Si4              | Si1 | Si2             | C1               | 50.64(8)    | Si4              | Si1 | Si2             | C2               | 169.26(7)  |
| Si4              | Si1 | Si2             | C3               | -70.56(9)   | Si3              | Si1 | Si4             | C7               | -79.09(9)  |
| Si3              | Si1 | Si4             | C8               | 41.24(9)    | Si3              | Si1 | Si4             | C9               | 161.23(7)  |
| Si4              | Si1 | Si3             | C4               | 161.70(7)   | Si4              | Si1 | Si3             | C5               | 39.84(10)  |
| Si4              | Si1 | Si3             | C6               | -79.93(8)   | Mn1              | O1  | C10             | C11              | -115.9(3)  |
| Mn1              | O1  | C10             | C12              | 123.6(3)    | Mn1              | O1  | C10             | C13              | 4.8(5)     |
| Mn1 <sup>1</sup> | O1  | C10             | C11              | 71.3(4)     | Mn1 <sup>1</sup> | O1  | C10             | C12              | -49.1(4)   |
| Mn1 <sup>1</sup> | O1  | C10             | C13              | -167.90(19) | Mn1              | O2  | O3              | Mn1              | 0.000(14)  |
| Mn1              | O2  | O3              | C14              | 123.0(4)    | Mn1              | O2  | O3              | C17              | -125.4(7)  |
| Mn1              | O2  | O3              | C18              | 128.2(8)    | Mn1              | O2  | O3              | C21              | -124.3(4)  |
| Mn1              | O2  | C14             | C15              | 160.3(6)    | Mn1              | O2  | C14             | C18              | -98.5(15)  |
| Mn1              | O2  | C14             | C19              | -173.7(5)   | Mn1              | O2  | C17             | C16              | -170.2(5)  |
| Mn1              | O2  | C17             | C20              | 156.8(5)    | Mn1              | O2  | C17             | C21              | 99.3(13)   |
| Mn1              | O2  | C18             | C14              | 95.8(13)    | Mn1              | O2  | C18             | C15              | 153.2(5)   |
| Mn1              | O2  | C18             | C19              | 173.7(5)    | Mn1              | O2  | C21             | C16              | -160.3(5)  |
| Mn1              | O2  | C21             | C17              | -94.7(15)   | Mn1              | O2  | C21             | C20              | 169.7(7)   |
| O3               | O2  | C14             | C15              | -113.1(19)  | O3               | O2  | C14             | C18              | -12(2)     |
| O3               | O2  | C14             | C19              | -87.2(19)   | C14              | O2  | O3              | Mn1              | -123.0(7)  |
| C14              | O2  | O3              | C14              | 0.0(6)      | C14              | O2  | O3              | C17              | 111.6(9)   |
| C14              | O2  | O3              | C18              | 5.1(9)      | C14              | O2  | O3              | C21              | 112.6(7)   |
| O3               | O2  | C17             | C16              | 87.4(17)    | O3               | O2  | C17             | C20              | 54.4(17)   |
| O3               | O2  | C17             | C21              | -3(2)       | C17              | O2  | O3              | Mn1              | 125.4(8)   |
| C17              | O2  | O3              | C14              | -111.6(8)   | C17              | O2  | O3              | C17              | -0.0(5)    |
| C17              | O2  | O3              | C18              | -106.4(10)  | C17              | O2  | O3              | C21              | 1.1(7)     |
| O3               | O2  | C18             | C14              | 166(2)      | O3               | O2  | C18             | C15              | -136(2)    |
| O3               | O2  | C18             | C19              | -116(2)     | C18              | O2  | O3              | Mn1              | -128.2(10) |
| C18              | O2  | O3              | C14              | -5.1(9)     | C18              | O2  | O3              | C17              | 106.4(10)  |

|     |    |     |     |            |     |    |     |     |            |
|-----|----|-----|-----|------------|-----|----|-----|-----|------------|
| C18 | O2 | O3  | C18 | 0.0(6)     | C18 | O2 | O3  | C21 | 107.5(11)  |
| O3  | O2 | C21 | C16 | 111.4(16)  | O3  | O2 | C21 | C17 | 177(2)     |
| O3  | O2 | C21 | C20 | 81.4(17)   | C21 | O2 | O3  | Mn1 | 124.3(6)   |
| C21 | O2 | O3  | C14 | -112.6(6)  | C21 | O2 | O3  | C17 | -1.1(7)    |
| C21 | O2 | O3  | C18 | -107.5(10) | C21 | O2 | O3  | C21 | 0.0(5)     |
| C14 | O2 | C17 | C16 | 2.8(12)    | C14 | O2 | C17 | C20 | -30.1(11)  |
| C14 | O2 | C17 | C21 | -87.6(14)  | C17 | O2 | C14 | C15 | -12.8(12)  |
| C17 | O2 | C14 | C18 | 88.4(17)   | C17 | O2 | C14 | C19 | 13.2(12)   |
| C14 | O2 | C18 | C14 | -0.0(16)   | C14 | O2 | C18 | C15 | 57.4(19)   |
| C14 | O2 | C18 | C19 | 78(2)      | C18 | O2 | C14 | C15 | -101(2)    |
| C18 | O2 | C14 | C18 | -0.0(13)   | C18 | O2 | C14 | C19 | -75(2)     |
| C14 | O2 | C21 | C16 | 35.2(12)   | C14 | O2 | C21 | C17 | 100.8(16)  |
| C14 | O2 | C21 | C20 | 5.1(15)    | C21 | O2 | C14 | C15 | -34.9(12)  |
| C21 | O2 | C14 | C18 | 66.2(18)   | C21 | O2 | C14 | C19 | -8.9(13)   |
| C17 | O2 | C18 | C14 | -100.4(14) | C17 | O2 | C18 | C15 | -43.0(9)   |
| C17 | O2 | C18 | C19 | -22.6(10)  | C18 | O2 | C17 | C16 | 26.0(11)   |
| C18 | O2 | C17 | C20 | -6.9(10)   | C18 | O2 | C17 | C21 | -64.4(14)  |
| C17 | O2 | C21 | C16 | -65.6(18)  | C17 | O2 | C21 | C17 | 0.0(13)    |
| C17 | O2 | C21 | C20 | -96(2)     | C21 | O2 | C17 | C16 | 90(2)      |
| C21 | O2 | C17 | C20 | 57.5(18)   | C21 | O2 | C17 | C21 | 0.0(14)    |
| C18 | O2 | C21 | C16 | 55.2(10)   | C18 | O2 | C21 | C17 | 120.8(14)  |
| C18 | O2 | C21 | C20 | 25.2(13)   | C21 | O2 | C18 | C14 | -119.3(14) |
| C21 | O2 | C18 | C15 | -61.9(8)   | C21 | O2 | C18 | C19 | -41.5(10)  |
| Mn1 | O3 | C14 | C15 | 141.7(7)   | Mn1 | O3 | C14 | C18 | -121.9(14) |
| Mn1 | O3 | C14 | C19 | 167.0(6)   | Mn1 | O3 | C17 | C16 | -155.7(6)  |
| Mn1 | O3 | C17 | C20 | 173.0(4)   | Mn1 | O3 | C17 | C21 | 117.0(12)  |
| Mn1 | O3 | C18 | C14 | 72.6(17)   | Mn1 | O3 | C18 | C15 | 131.1(7)   |
| Mn1 | O3 | C18 | C19 | 153.9(6)   | Mn1 | O3 | C21 | C16 | -140.7(6)  |
| Mn1 | O3 | C21 | C17 | -71.8(16)  | Mn1 | O3 | C21 | C20 | -173.6(6)  |
| O2  | O3 | C14 | C15 | 70.5(19)   | O2  | O3 | C14 | C18 | 167(2)     |
| O2  | O3 | C14 | C19 | 95.8(19)   | O2  | O3 | C17 | C16 | -96.1(17)  |
| O2  | O3 | C17 | C20 | -127.3(16) | O2  | O3 | C17 | C21 | 177(2)     |
| O2  | O3 | C18 | C14 | -14(2)     | O2  | O3 | C18 | C15 | 45(2)      |
| O2  | O3 | C18 | C19 | 68(2)      | O2  | O3 | C21 | C16 | -71.9(16)  |
| O2  | O3 | C21 | C17 | -3(2)      | O2  | O3 | C21 | C20 | -104.8(17) |
| C14 | O3 | C17 | C16 | -21.4(11)  | C14 | O3 | C17 | C20 | -52.7(10)  |
| C14 | O3 | C17 | C21 | -108.7(14) | C17 | O3 | C14 | C15 | 11.4(12)   |
| C17 | O3 | C14 | C18 | 107.9(16)  | C17 | O3 | C14 | C19 | 36.8(11)   |
| C14 | O3 | C18 | C14 | -0.0(16)   | C14 | O3 | C18 | C15 | 58(2)      |

|     |     |     |     |            |     |     |     |     |            |
|-----|-----|-----|-----|------------|-----|-----|-----|-----|------------|
| C14 | O3  | C18 | C19 | 81(2)      | C18 | O3  | C14 | C15 | -96(2)     |
| C18 | O3  | C14 | C18 | 0.0(15)    | C18 | O3  | C14 | C19 | -71(2)     |
| C14 | O3  | C21 | C16 | 8.6(13)    | C14 | O3  | C21 | C17 | 77.5(18)   |
| C14 | O3  | C21 | C20 | -24.3(14)  | C21 | O3  | C14 | C15 | -7.6(14)   |
| C21 | O3  | C14 | C18 | 88.8(17)   | C21 | O3  | C14 | C19 | 17.7(13)   |
| C17 | O3  | C18 | C14 | -79.7(16)  | C17 | O3  | C18 | C15 | -21.2(11)  |
| C17 | O3  | C18 | C19 | 1.6(12)    | C18 | O3  | C17 | C16 | 1.4(12)    |
| C18 | O3  | C17 | C20 | -29.8(10)  | C18 | O3  | C17 | C21 | -85.8(14)  |
| C18 | O3  | C21 | C16 | 32.2(12)   | C18 | O3  | C21 | C17 | 101.1(17)  |
| C18 | O3  | C21 | C20 | -0.6(14)   | C21 | O3  | C18 | C14 | -99.5(15)  |
| C21 | O3  | C18 | C15 | -41.0(11)  | C21 | O3  | C18 | C19 | -18.2(12)  |
| O2  | C14 | C15 | C16 | 18.0(16)   | O2  | C14 | C15 | C19 | 93.4(16)   |
| O2  | C14 | C15 | C20 | 41.8(12)   | O2  | C14 | C18 | O2  | -0.0(3)    |
| O2  | C14 | C18 | O3  | 3.6(7)     | O2  | C14 | C18 | C15 | -99.0(10)  |
| O2  | C14 | C18 | C19 | -104.2(7)  | O2  | C14 | C19 | C15 | -91.7(13)  |
| O2  | C14 | C19 | C16 | -23.8(12)  | O2  | C14 | C19 | C18 | 76.6(12)   |
| O2  | C14 | C19 | C20 | 9.6(13)    | O3  | C14 | C15 | C16 | 3.0(17)    |
| O3  | C14 | C15 | C19 | 78.4(17)   | O3  | C14 | C15 | C20 | 26.9(13)   |
| O3  | C14 | C18 | O2  | -3.6(7)    | O3  | C14 | C18 | O3  | 0.0(4)     |
| O3  | C14 | C18 | C15 | -102.6(11) | O3  | C14 | C18 | C19 | -107.7(9)  |
| O3  | C14 | C19 | C15 | -107.6(13) | O3  | C14 | C19 | C16 | -39.6(12)  |
| O3  | C14 | C19 | C18 | 60.7(11)   | O3  | C14 | C19 | C20 | -6.2(14)   |
| C15 | C14 | C18 | O2  | 99.0(12)   | C15 | C14 | C18 | O3  | 102.6(12)  |
| C15 | C14 | C18 | C15 | 0.0(7)     | C15 | C14 | C18 | C19 | -5.1(10)   |
| C18 | C14 | C15 | C16 | -64(2)     | C18 | C14 | C15 | C19 | 12(2)      |
| C18 | C14 | C15 | C20 | -40(2)     | C15 | C14 | C19 | C15 | -0.0(15)   |
| C15 | C14 | C19 | C16 | 67.9(19)   | C15 | C14 | C19 | C18 | 168(2)     |
| C15 | C14 | C19 | C20 | 101(2)     | C19 | C14 | C15 | C16 | -75.4(19)  |
| C19 | C14 | C15 | C19 | -0.0(11)   | C19 | C14 | C15 | C20 | -51.6(16)  |
| C18 | C14 | C19 | C15 | -168(2)    | C18 | C14 | C19 | C16 | -100.3(19) |
| C18 | C14 | C19 | C18 | -0.0(11)   | C18 | C14 | C19 | C20 | -67.0(19)  |
| C19 | C14 | C18 | O2  | 104.2(8)   | C19 | C14 | C18 | O3  | 107.7(9)   |
| C19 | C14 | C18 | C15 | 5.1(9)     | C19 | C14 | C18 | C19 | -0.0(5)    |
| C14 | C15 | C16 | C17 | -18(2)     | C14 | C15 | C16 | C19 | 74.5(17)   |
| C14 | C15 | C16 | C20 | 65(2)      | C14 | C15 | C16 | C21 | 2(2)       |
| C14 | C15 | C19 | C14 | -0.0(5)    | C14 | C15 | C19 | C16 | -112.0(9)  |
| C14 | C15 | C19 | C18 | -4.3(9)    | C14 | C15 | C19 | C20 | -106.9(12) |
| C14 | C15 | C20 | C16 | -120.4(17) | C14 | C15 | C20 | C17 | -57.3(12)  |
| C14 | C15 | C20 | C19 | 71.1(18)   | C14 | C15 | C20 | C21 | -40.0(14)  |

|     |     |     |     |            |     |     |     |     |            |
|-----|-----|-----|-----|------------|-----|-----|-----|-----|------------|
| C16 | C15 | C18 | O2  | 45.0(14)   | C16 | C15 | C18 | O3  | 34.4(15)   |
| C16 | C15 | C18 | C14 | 120.7(18)  | C16 | C15 | C18 | C19 | -72.5(17)  |
| C18 | C15 | C16 | C17 | -34.8(17)  | C18 | C15 | C16 | C19 | 57.5(14)   |
| C18 | C15 | C16 | C20 | 48(2)      | C18 | C15 | C16 | C21 | -15.0(17)  |
| C16 | C15 | C19 | C14 | 112.0(11)  | C16 | C15 | C19 | C16 | 0.0(8)     |
| C16 | C15 | C19 | C18 | 107.7(11)  | C16 | C15 | C19 | C20 | 5.1(14)    |
| C19 | C15 | C16 | C17 | -92(2)     | C19 | C15 | C16 | C19 | -0.0(13)   |
| C19 | C15 | C16 | C20 | -9(3)      | C19 | C15 | C16 | C21 | -72(2)     |
| C16 | C15 | C20 | C16 | -0.0(17)   | C16 | C15 | C20 | C17 | 63(2)      |
| C16 | C15 | C20 | C19 | -168(3)    | C16 | C15 | C20 | C21 | 80(2)      |
| C20 | C15 | C16 | C17 | -83(2)     | C20 | C15 | C16 | C19 | 9(3)       |
| C20 | C15 | C16 | C20 | -0.0(12)   | C20 | C15 | C16 | C21 | -63.0(19)  |
| C18 | C15 | C19 | C14 | 4.3(8)     | C18 | C15 | C19 | C16 | -107.7(9)  |
| C18 | C15 | C19 | C18 | 0.0(4)     | C18 | C15 | C19 | C20 | -102.6(13) |
| C19 | C15 | C18 | O2  | 117(2)     | C19 | C15 | C18 | O3  | 107(2)     |
| C19 | C15 | C18 | C14 | -167(3)    | C19 | C15 | C18 | C19 | -0.0(13)   |
| C18 | C15 | C20 | C16 | -132.4(15) | C18 | C15 | C20 | C17 | -69.2(10)  |
| C18 | C15 | C20 | C19 | 59.1(15)   | C18 | C15 | C20 | C21 | -52.0(11)  |
| C20 | C15 | C18 | O2  | 64.3(9)    | C20 | C15 | C18 | O3  | 53.8(10)   |
| C20 | C15 | C18 | C14 | 140.1(15)  | C20 | C15 | C18 | C19 | -53.1(13)  |
| C19 | C15 | C20 | C16 | 168(3)     | C19 | C15 | C20 | C17 | -128(2)    |
| C19 | C15 | C20 | C19 | -0.0(16)   | C19 | C15 | C20 | C21 | -111(2)    |
| C20 | C15 | C19 | C14 | 106.9(13)  | C20 | C15 | C19 | C16 | -5.1(13)   |
| C20 | C15 | C19 | C18 | 102.6(14)  | C20 | C15 | C19 | C20 | 0.0(7)     |
| C15 | C16 | C17 | O2  | 9.0(18)    | C15 | C16 | C17 | O3  | 23.7(17)   |
| C15 | C16 | C17 | C20 | 101(2)     | C15 | C16 | C17 | C21 | 87(2)      |
| C15 | C16 | C19 | C14 | -69(2)     | C15 | C16 | C19 | C15 | 0.0(17)    |
| C15 | C16 | C19 | C18 | -92(2)     | C15 | C16 | C19 | C20 | -171(3)    |
| C15 | C16 | C20 | C15 | 0.0(8)     | C15 | C16 | C20 | C17 | -107.2(17) |
| C15 | C16 | C20 | C19 | 4.2(11)    | C15 | C16 | C20 | C21 | -102.1(15) |
| C15 | C16 | C21 | O2  | -22.1(17)  | C15 | C16 | C21 | O3  | -6.5(18)   |
| C15 | C16 | C21 | C17 | -99(2)     | C15 | C16 | C21 | C20 | 96.5(19)   |
| C17 | C16 | C19 | C14 | 27.4(16)   | C17 | C16 | C19 | C15 | 96.7(17)   |
| C17 | C16 | C19 | C18 | 5.0(17)    | C17 | C16 | C19 | C20 | -73.9(14)  |
| C19 | C16 | C17 | O2  | -18.5(16)  | C19 | C16 | C17 | O3  | -3.8(16)   |
| C19 | C16 | C17 | C20 | 73.4(16)   | C19 | C16 | C17 | C21 | 59(2)      |
| C17 | C16 | C20 | C15 | 107.2(16)  | C17 | C16 | C20 | C17 | 0.0(5)     |
| C17 | C16 | C20 | C19 | 111.5(11)  | C17 | C16 | C20 | C21 | 5.1(8)     |
| C20 | C16 | C17 | O2  | -91.9(19)  | C20 | C16 | C17 | O3  | -77.2(19)  |

|     |     |     |     |            |     |     |     |     |            |
|-----|-----|-----|-----|------------|-----|-----|-----|-----|------------|
| C20 | C16 | C17 | C20 | 0.0(12)    | C20 | C16 | C17 | C21 | -14(2)     |
| C19 | C16 | C20 | C15 | -4.2(10)   | C19 | C16 | C20 | C17 | -111.5(11) |
| C19 | C16 | C20 | C19 | 0.0(6)     | C19 | C16 | C20 | C21 | -106.3(11) |
| C20 | C16 | C19 | C14 | 101.4(19)  | C20 | C16 | C19 | C15 | 171(2)     |
| C20 | C16 | C19 | C18 | 78.9(19)   | C20 | C16 | C19 | C20 | -0.0(12)   |
| C19 | C16 | C21 | O2  | -47.2(14)  | C19 | C16 | C21 | O3  | -31.5(15)  |
| C19 | C16 | C21 | C17 | -124.3(19) | C19 | C16 | C21 | C20 | 71.4(14)   |
| C21 | C16 | C19 | C14 | 43.8(14)   | C21 | C16 | C19 | C15 | 113.0(16)  |
| C21 | C16 | C19 | C18 | 21.4(15)   | C21 | C16 | C19 | C20 | -57.5(11)  |
| C20 | C16 | C21 | O2  | -119(2)    | C20 | C16 | C21 | O3  | -103(2)    |
| C20 | C16 | C21 | C17 | 164(3)     | C20 | C16 | C21 | C20 | -0.0(14)   |
| C21 | C16 | C20 | C15 | 102.1(14)  | C21 | C16 | C20 | C17 | -5.1(9)    |
| C21 | C16 | C20 | C19 | 106.3(11)  | C21 | C16 | C20 | C21 | 0.0(6)     |
| O2  | C17 | C20 | C15 | 49.0(9)    | O2  | C17 | C20 | C16 | 96.0(13)   |
| O2  | C17 | C20 | C19 | 32.8(12)   | O2  | C17 | C21 | O2  | 0.0(3)     |
| O2  | C17 | C21 | O3  | 0.8(6)     | O2  | C17 | C21 | C16 | 103.7(8)   |
| O2  | C17 | C21 | C20 | 112.0(10)  | O3  | C17 | C20 | C15 | 60.7(8)    |
| O3  | C17 | C20 | C16 | 107.6(12)  | O3  | C17 | C20 | C19 | 44.5(10)   |
| O3  | C17 | C21 | O2  | -0.8(6)    | O3  | C17 | C21 | O3  | -0.0(3)    |
| O3  | C17 | C21 | C16 | 102.8(10)  | O3  | C17 | C21 | C20 | 111.1(12)  |
| C16 | C17 | C20 | C15 | -47.0(17)  | C16 | C17 | C20 | C16 | 0.0(15)    |
| C16 | C17 | C20 | C19 | -63.2(18)  | C16 | C17 | C21 | O2  | -103.7(11) |
| C16 | C17 | C21 | O3  | -102.8(12) | C16 | C17 | C21 | C16 | 0.0(8)     |
| C16 | C17 | C21 | C20 | 8.3(14)    | C20 | C17 | C21 | O2  | -112.0(12) |
| C20 | C17 | C21 | O3  | -111.1(14) | C20 | C17 | C21 | C16 | -8.3(14)   |
| C20 | C17 | C21 | C20 | -0.0(7)    | C21 | C17 | C20 | C15 | 117(2)     |
| C21 | C17 | C20 | C16 | 164(3)     | C21 | C17 | C20 | C19 | 101(2)     |
| O2  | C18 | C19 | C14 | -76.4(12)  | O2  | C18 | C19 | C15 | -65.0(14)  |
| O2  | C18 | C19 | C16 | 10.1(12)   | O2  | C18 | C19 | C20 | 41.9(10)   |
| O3  | C18 | C19 | C14 | -90.6(14)  | O3  | C18 | C19 | C15 | -79.1(15)  |
| O3  | C18 | C19 | C16 | -4.1(14)   | O3  | C18 | C19 | C20 | 27.7(12)   |
| C14 | C18 | C19 | C14 | -0.0(14)   | C14 | C18 | C19 | C15 | 11(2)      |
| C14 | C18 | C19 | C16 | 86.5(19)   | C14 | C18 | C19 | C20 | 118.3(18)  |
| C15 | C18 | C19 | C14 | -11(2)     | C15 | C18 | C19 | C15 | -0.0(15)   |
| C15 | C18 | C19 | C16 | 75(2)      | C15 | C18 | C19 | C20 | 107(2)     |
| C14 | C19 | C20 | C15 | -79.9(17)  | C14 | C19 | C20 | C16 | -89.2(15)  |
| C14 | C19 | C20 | C17 | -26.7(15)  | C14 | C19 | C20 | C21 | -7.1(17)   |
| C15 | C19 | C20 | C15 | 0.0(17)    | C15 | C19 | C20 | C16 | -9(2)      |
| C15 | C19 | C20 | C17 | 53(2)      | C15 | C19 | C20 | C21 | 73(3)      |

|     |     |     |     |           |     |     |     |     |            |
|-----|-----|-----|-----|-----------|-----|-----|-----|-----|------------|
| C16 | C19 | C20 | C15 | 9(2)      | C16 | C19 | C20 | C16 | -0.0(14)   |
| C16 | C19 | C20 | C17 | 62.5(18)  | C16 | C19 | C20 | C21 | 82(2)      |
| C18 | C19 | C20 | C15 | -99.9(18) | C18 | C19 | C20 | C16 | -109.3(14) |
| C18 | C19 | C20 | C17 | -46.8(13) | C18 | C19 | C20 | C21 | -27.2(14)  |
| C15 | C20 | C21 | O2  | 20.9(16)  | C15 | C20 | C21 | O3  | 37.9(15)   |
| C15 | C20 | C21 | C16 | -49.1(11) | C15 | C20 | C21 | C17 | -64(2)     |
| C16 | C20 | C21 | O2  | 70(2)     | C16 | C20 | C21 | O3  | 87(2)      |
| C16 | C20 | C21 | C16 | -0.0(14)  | C16 | C20 | C21 | C17 | -15(2)     |
| C19 | C20 | C21 | O2  | 1.2(17)   | C19 | C20 | C21 | O3  | 18.3(16)   |
| C19 | C20 | C21 | C16 | -68.7(13) | C19 | C20 | C21 | C17 | -83(2)     |

Symmetry Operators:

(1)  $-X+1,-Y+1,-Z+1$

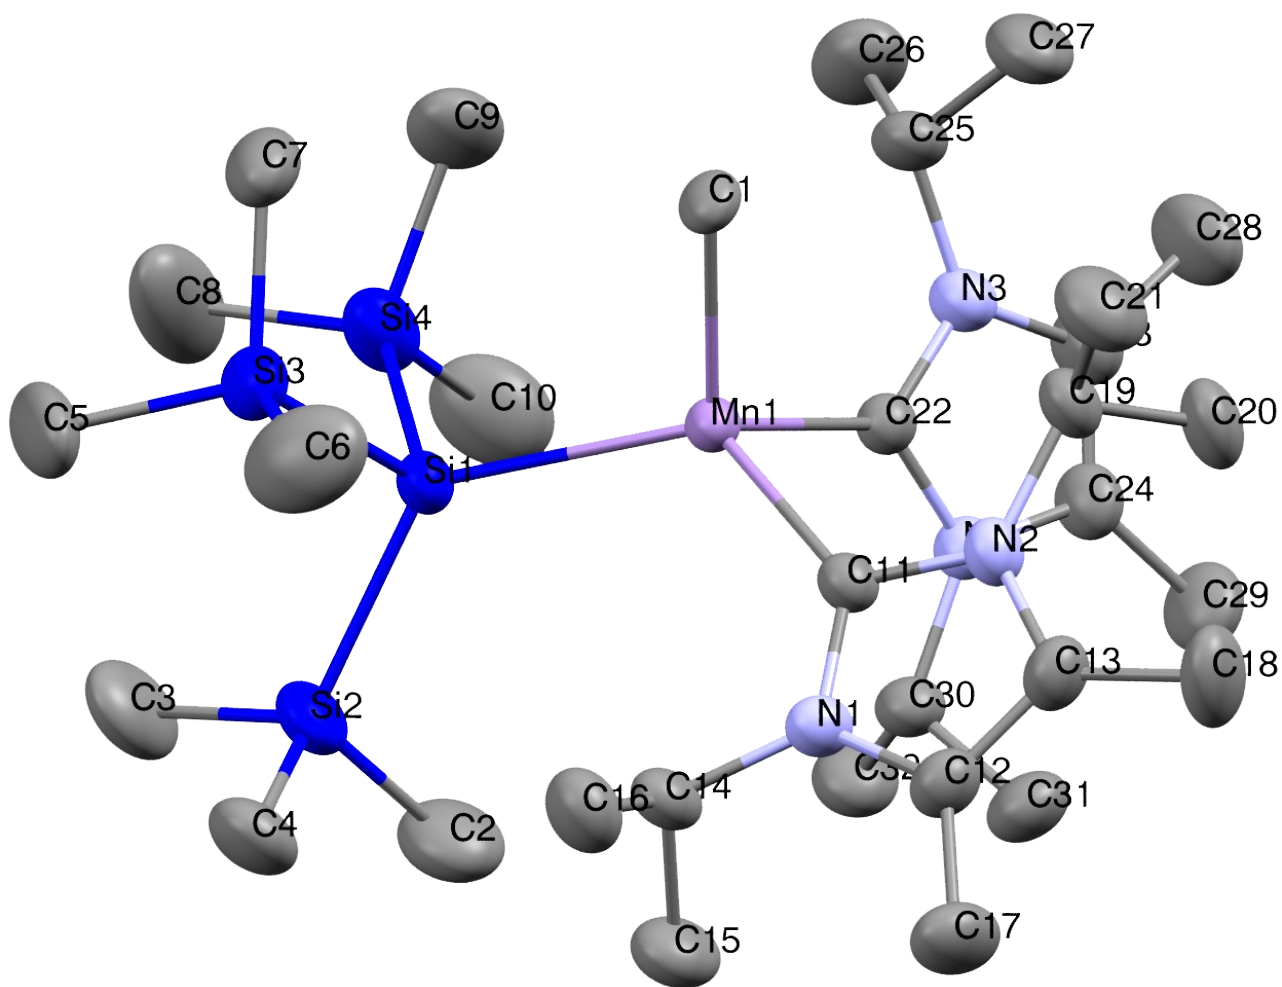

**Figure S9.** ORTEP drawing of **4** (50% probability of the thermal ellipsoids)

**Table S3-1.** Crystal data and structure refinement for **4**.

|                                      |                                                                                                             |
|--------------------------------------|-------------------------------------------------------------------------------------------------------------|
| Empirical Formula                    | C <sub>32</sub> H <sub>70</sub> MnN <sub>4</sub> Si <sub>4</sub>                                            |
| Formula Weight                       | 678.21                                                                                                      |
| Crystal Color, Habit                 | colorless, block                                                                                            |
| Crystal Dimensions                   | 0.200 X 0.150 X 0.150 mm                                                                                    |
| Crystal System                       | monoclinic                                                                                                  |
| Lattice Type                         | Primitive                                                                                                   |
| Lattice Parameters                   | a = 10.0789(16) Å<br>b = 23.499(4) Å<br>c = 18.131(3) Å<br>β = 90.882(2) °<br>V = 4293.8(12) Å <sup>3</sup> |
| Space Group                          | P2 <sub>1</sub> /n (#14)                                                                                    |
| Z value                              | 4                                                                                                           |
| D <sub>calc</sub>                    | 1.049 g/cm <sup>3</sup>                                                                                     |
| F <sub>000</sub>                     | 1484.00                                                                                                     |
| μ(MoKα)                              | 4.423 cm <sup>-1</sup>                                                                                      |
| Diffractometer                       | Saturn724                                                                                                   |
| Radiation                            | MoKα (λ = 0.71075 Å)<br>multi-layer mirror monochromated                                                    |
| Voltage, Current                     | 50kV, 24mA                                                                                                  |
| Temperature                          | -69.8°C                                                                                                     |
| Detector Aperture                    | 72.8 x 72.8 mm                                                                                              |
| Data Images                          | 720 exposures                                                                                               |
| ω oscillation Range (χ=45.0, φ=0.0)  | -70.0 - 110.0°                                                                                              |
| Exposure Rate                        | 4.0 sec./°                                                                                                  |
| Detector Swing Angle                 | 19.95°                                                                                                      |
| ω oscillation Range (χ=45.0, φ=90.0) | -70.0 - 110.0°                                                                                              |
| Exposure Rate                        | 4.0 sec./°                                                                                                  |
| Detector Swing Angle                 | 19.95°                                                                                                      |
| Detector Position                    | 44.81 mm                                                                                                    |
| Pixel Size                           | 0.141 mm                                                                                                    |
| 2θ <sub>max</sub>                    | 55.0°                                                                                                       |
| No. of Reflections Measured          | Total: 35096<br>Unique: 9686 (R <sub>int</sub> = 0.1078)                                                    |
| Corrections                          | Lorentz-polarization<br>Absorption<br>(trans. factors: 0.768 - 0.936)                                       |



|                                       |                                                                     |
|---------------------------------------|---------------------------------------------------------------------|
| Structure Solution                    | Direct Methods (SHELXT Version 2014/5)                              |
| Refinement                            | Full-matrix least-squares on $F^2$                                  |
| Function Minimized                    | $\Sigma w (F_o^2 - F_c^2)^2$                                        |
| Least Squares Weights                 | $w = 1 / [ \sigma^2(F_o^2) + (0.0671 \cdot P)^2 + 2.9677 \cdot P ]$ |
|                                       | where $P = (\text{Max}(F_o^2, 0) + 2F_c^2)/3$                       |
| $2\theta_{\text{max}}$ cutoff         | 55.0°                                                               |
| Anomalous Dispersion                  | All non-hydrogen atoms                                              |
| No. Observations (All reflections)    | 9686                                                                |
| No. Variables                         | 370                                                                 |
| Reflection/Parameter Ratio            | 26.18                                                               |
| Residuals: R1 ( $I > 2.00\sigma(I)$ ) | 0.0635                                                              |
| Residuals: R (All reflections)        | 0.0792                                                              |
| Residuals: wR2 (All reflections)      | 0.1754                                                              |
| Goodness of Fit Indicator             | 1.089                                                               |
| Max Shift/Error in Final Cycle        | 0.001                                                               |
| Maximum peak in Final Diff. Map       | 0.44 e <sup>-</sup> /Å <sup>3</sup>                                 |
| Minimum peak in Final Diff. Map       | -0.44 e <sup>-</sup> /Å <sup>3</sup>                                |

**Table S3-2.** Atomic coordinates and  $B_{iso}/B_{eq}$ 

| atom | x           | y           | z           | $B_{eq}$  |
|------|-------------|-------------|-------------|-----------|
| Mn1  | 0.67630(4)  | 0.32132(2)  | 0.28199(2)  | 2.246(10) |
| Si1  | 0.54155(8)  | 0.41303(3)  | 0.24015(4)  | 2.634(15) |
| Si2  | 0.48000(9)  | 0.49230(4)  | 0.30983(5)  | 3.732(18) |
| Si3  | 0.64308(10) | 0.45369(4)  | 0.13731(5)  | 3.850(19) |
| Si4  | 0.33812(9)  | 0.37977(4)  | 0.19400(6)  | 4.22(2)   |
| N1   | 0.9055(2)   | 0.36762(10) | 0.40227(13) | 2.73(4)   |
| N2   | 0.9243(2)   | 0.27827(10) | 0.38062(13) | 2.73(4)   |
| N3   | 0.5164(2)   | 0.20508(10) | 0.32633(13) | 2.94(4)   |
| N4   | 0.5430(2)   | 0.25739(10) | 0.42250(12) | 2.65(4)   |
| C1   | 0.7557(3)   | 0.28244(13) | 0.18136(14) | 2.82(5)   |
| C2   | 0.4319(5)   | 0.4702(2)   | 0.4057(2)   | 6.18(10)  |
| C3   | 0.3352(4)   | 0.53590(19) | 0.2741(3)   | 6.61(11)  |
| C4   | 0.6187(4)   | 0.54549(16) | 0.3215(2)   | 5.14(8)   |
| C5   | 0.5689(6)   | 0.52338(18) | 0.1055(3)   | 7.22(13)  |
| C6   | 0.8233(5)   | 0.4670(3)   | 0.1581(3)   | 7.41(13)  |
| C7   | 0.6378(4)   | 0.40620(17) | 0.05418(19) | 5.09(8)   |
| C8   | 0.2328(5)   | 0.4303(2)   | 0.1386(4)   | 8.58(16)  |
| C9   | 0.3650(4)   | 0.31715(18) | 0.1311(3)   | 5.67(9)   |
| C10  | 0.2343(5)   | 0.3537(2)   | 0.2720(3)   | 7.33(13)  |
| C11  | 0.8522(3)   | 0.32490(11) | 0.36054(15) | 2.43(4)   |
| C12  | 1.0083(3)   | 0.34767(14) | 0.44763(16) | 3.10(5)   |
| C13  | 1.0198(3)   | 0.29135(14) | 0.43416(16) | 3.14(5)   |
| C14  | 0.8611(3)   | 0.42699(12) | 0.39324(17) | 3.08(5)   |
| C15  | 0.8086(4)   | 0.45172(17) | 0.4643(2)   | 4.65(7)   |
| C16  | 0.9688(4)   | 0.46341(15) | 0.3593(2)   | 4.38(7)   |
| C17  | 1.0877(4)   | 0.38260(17) | 0.5018(2)   | 4.55(7)   |
| C18  | 1.1152(4)   | 0.25009(16) | 0.4679(2)   | 4.89(8)   |
| C19  | 0.8990(3)   | 0.22198(12) | 0.34673(17) | 3.15(5)   |
| C20  | 0.8517(4)   | 0.17824(14) | 0.4024(2)   | 4.23(7)   |
| C21  | 1.0168(4)   | 0.20204(18) | 0.3019(2)   | 5.09(8)   |
| C22  | 0.5582(3)   | 0.25774(11) | 0.34790(14) | 2.45(4)   |
| C23  | 0.4755(3)   | 0.17248(14) | 0.38595(19) | 3.62(6)   |
| C24  | 0.4931(3)   | 0.20521(14) | 0.44644(17) | 3.36(5)   |
| C25  | 0.5129(3)   | 0.18874(14) | 0.24765(17) | 3.57(6)   |
| C26  | 0.3724(4)   | 0.17728(19) | 0.2206(2)   | 5.63(9)   |
| C27  | 0.6080(5)   | 0.13953(17) | 0.2327(2)   | 5.29(8)   |
| C28  | 0.4272(5)   | 0.11250(17) | 0.3820(3)   | 5.79(9)   |

|     |           |             |             |         |
|-----|-----------|-------------|-------------|---------|
| C29 | 0.4699(4) | 0.18934(17) | 0.5251(2)   | 4.75(8) |
| C30 | 0.5662(3) | 0.30918(13) | 0.46692(16) | 2.98(5) |
| C31 | 0.6722(3) | 0.30097(17) | 0.52661(17) | 4.03(6) |
| C32 | 0.4363(4) | 0.33145(16) | 0.4976(2)   | 4.41(7) |

$$B_{\text{eq}} = 8/3 \pi^2 (U_{11}(aa^*)^2 + U_{22}(bb^*)^2 + U_{33}(cc^*)^2 + 2U_{12}(aa^*bb^*)\cos \gamma + 2U_{13}(aa^*cc^*)\cos \beta + 2U_{23}(bb^*cc^*)\cos \alpha)$$

**Table S3-3.** Anisotropic displacement parameters

| atom | U <sub>11</sub> | U <sub>22</sub> | U <sub>33</sub> | U <sub>12</sub> | U <sub>13</sub> | U <sub>23</sub> |
|------|-----------------|-----------------|-----------------|-----------------|-----------------|-----------------|
| Mn1  | 0.0341(2)       | 0.0266(2)       | 0.0247(2)       | 0.00178(15)     | 0.00003(15)     | 0.00000(14)     |
| Si1  | 0.0380(4)       | 0.0270(4)       | 0.0350(4)       | 0.0032(3)       | -0.0027(3)      | 0.0009(3)       |
| Si2  | 0.0522(5)       | 0.0328(4)       | 0.0568(6)       | 0.0115(4)       | 0.0022(4)       | -0.0061(4)      |
| Si3  | 0.0684(6)       | 0.0389(5)       | 0.0389(5)       | -0.0057(4)      | 0.0004(4)       | 0.0078(4)       |
| Si4  | 0.0433(5)       | 0.0417(5)       | 0.0747(7)       | -0.0007(4)      | -0.0166(5)      | -0.0026(5)      |
| N1   | 0.0314(12)      | 0.0370(13)      | 0.0352(12)      | 0.0015(10)      | -0.0037(9)      | -0.0042(10)     |
| N2   | 0.0325(12)      | 0.0320(12)      | 0.0393(13)      | 0.0034(9)       | -0.0015(10)     | 0.0026(10)      |
| N3   | 0.0439(14)      | 0.0330(13)      | 0.0348(13)      | -0.0041(10)     | 0.0049(10)      | -0.0015(10)     |
| N4   | 0.0360(12)      | 0.0354(13)      | 0.0294(12)      | 0.0002(10)      | 0.0054(9)       | 0.0014(9)       |
| C1   | 0.0448(16)      | 0.0392(15)      | 0.0234(13)      | 0.0033(12)      | 0.0065(11)      | 0.0039(11)      |
| C2   | 0.094(3)        | 0.074(3)        | 0.068(3)        | 0.007(2)        | 0.026(2)        | -0.019(2)       |
| C3   | 0.078(3)        | 0.057(3)        | 0.115(4)        | 0.035(2)        | -0.013(3)       | -0.017(3)       |
| C4   | 0.081(3)        | 0.0392(19)      | 0.075(3)        | -0.0036(18)     | -0.002(2)       | -0.0137(18)     |
| C5   | 0.169(5)        | 0.042(2)        | 0.063(3)        | 0.008(3)        | 0.009(3)        | 0.018(2)        |
| C6   | 0.082(3)        | 0.123(5)        | 0.077(3)        | -0.041(3)       | 0.015(2)        | 0.006(3)        |
| C7   | 0.095(3)        | 0.060(2)        | 0.0389(19)      | 0.016(2)        | 0.0020(18)      | 0.0042(16)      |
| C8   | 0.090(3)        | 0.074(3)        | 0.160(5)        | 0.016(3)        | -0.074(4)       | -0.005(3)       |
| C9   | 0.075(3)        | 0.063(3)        | 0.077(3)        | -0.012(2)       | -0.026(2)       | -0.014(2)       |
| C10  | 0.059(3)        | 0.092(4)        | 0.128(5)        | -0.020(3)       | 0.021(3)        | -0.015(3)       |
| C11  | 0.0313(14)      | 0.0279(13)      | 0.0331(14)      | 0.0012(10)      | 0.0023(10)      | -0.0022(10)     |
| C12  | 0.0341(15)      | 0.0476(17)      | 0.0361(15)      | -0.0011(13)     | -0.0059(11)     | 0.0006(13)      |
| C13  | 0.0341(15)      | 0.0457(17)      | 0.0393(16)      | 0.0004(13)      | -0.0065(12)     | 0.0063(13)      |
| C14  | 0.0392(16)      | 0.0322(14)      | 0.0455(17)      | 0.0043(12)      | -0.0027(12)     | -0.0097(12)     |
| C15  | 0.065(2)        | 0.054(2)        | 0.058(2)        | 0.0125(18)      | 0.0033(17)      | -0.0175(17)     |
| C16  | 0.059(2)        | 0.0407(18)      | 0.067(2)        | -0.0015(15)     | -0.0005(17)     | 0.0018(16)      |
| C17  | 0.051(2)        | 0.066(2)        | 0.055(2)        | 0.0044(17)      | -0.0184(16)     | -0.0140(18)     |
| C18  | 0.052(2)        | 0.052(2)        | 0.081(3)        | 0.0041(16)      | -0.0224(18)     | 0.0198(19)      |
| C19  | 0.0433(16)      | 0.0285(14)      | 0.0479(17)      | 0.0047(12)      | -0.0030(13)     | -0.0009(12)     |
| C20  | 0.057(2)        | 0.0315(16)      | 0.072(2)        | 0.0023(14)      | -0.0061(17)     | 0.0106(15)      |
| C21  | 0.062(2)        | 0.056(2)        | 0.075(3)        | 0.0106(18)      | 0.0112(19)      | -0.012(2)       |
| C22  | 0.0320(14)      | 0.0308(13)      | 0.0304(13)      | 0.0001(11)      | 0.0012(10)      | 0.0006(10)      |

|     |            |            |            |             |             |             |
|-----|------------|------------|------------|-------------|-------------|-------------|
| C23 | 0.0523(19) | 0.0364(16) | 0.0490(19) | -0.0086(14) | 0.0108(14)  | 0.0048(13)  |
| C24 | 0.0465(18) | 0.0396(16) | 0.0418(17) | -0.0033(13) | 0.0110(13)  | 0.0070(13)  |
| C25 | 0.058(2)   | 0.0386(16) | 0.0386(16) | -0.0063(14) | -0.0045(14) | -0.0080(13) |
| C26 | 0.078(3)   | 0.069(3)   | 0.066(3)   | -0.027(2)   | -0.016(2)   | -0.001(2)   |
| C27 | 0.100(3)   | 0.049(2)   | 0.052(2)   | 0.009(2)    | 0.008(2)    | -0.0136(17) |
| C28 | 0.103(3)   | 0.045(2)   | 0.073(3)   | -0.022(2)   | 0.019(2)    | 0.0045(19)  |
| C29 | 0.073(3)   | 0.062(2)   | 0.046(2)   | -0.0040(19) | 0.0162(18)  | 0.0140(17)  |
| C30 | 0.0429(16) | 0.0392(16) | 0.0313(14) | 0.0003(12)  | 0.0018(12)  | -0.0043(12) |
| C31 | 0.055(2)   | 0.063(2)   | 0.0348(16) | -0.0036(17) | -0.0052(14) | -0.0014(15) |
| C32 | 0.061(2)   | 0.058(2)   | 0.049(2)   | 0.0106(17)  | 0.0107(16)  | -0.0090(16) |

The general temperature factor expression:  $\exp(-2\pi^2(a^2U_{11}h^2 + b^2U_{22}k^2 + c^2U_{33}l^2 + 2a*b*U_{12}hk + 2a*c*U_{13}hl + 2b*c*U_{23}kl))$

**Table S3-4.** Bond lengths (Å)

| atom | atom | distance   | atom | atom | distance   |
|------|------|------------|------|------|------------|
| Mn1  | Si1  | 2.6520(9)  | Mn1  | C1   | 2.202(3)   |
| Mn1  | C11  | 2.258(3)   | Mn1  | C22  | 2.263(3)   |
| Si1  | Si2  | 2.3399(12) | Si1  | Si3  | 2.3443(12) |
| Si1  | Si4  | 2.3371(13) | Si2  | C2   | 1.884(5)   |
| Si2  | C3   | 1.889(5)   | Si2  | C4   | 1.885(4)   |
| Si3  | C5   | 1.887(5)   | Si3  | C6   | 1.876(5)   |
| Si3  | C7   | 1.876(4)   | Si4  | C8   | 1.874(6)   |
| Si4  | C9   | 1.883(4)   | Si4  | C10  | 1.876(5)   |
| N1   | C11  | 1.362(4)   | N1   | C12  | 1.394(4)   |
| N1   | C14  | 1.473(4)   | N2   | C11  | 1.361(3)   |
| N2   | C13  | 1.391(4)   | N2   | C19  | 1.479(4)   |
| N3   | C22  | 1.363(3)   | N3   | C23  | 1.392(4)   |
| N3   | C25  | 1.477(4)   | N4   | C22  | 1.364(3)   |
| N4   | C24  | 1.397(4)   | N4   | C30  | 1.476(4)   |
| C12  | C13  | 1.351(5)   | C12  | C17  | 1.502(5)   |
| C13  | C18  | 1.490(5)   | C14  | C15  | 1.515(5)   |
| C14  | C16  | 1.520(5)   | C19  | C20  | 1.523(5)   |
| C19  | C21  | 1.523(5)   | C23  | C24  | 1.349(5)   |
| C23  | C28  | 1.492(5)   | C24  | C29  | 1.496(5)   |
| C25  | C26  | 1.516(5)   | C25  | C27  | 1.529(5)   |
| C30  | C31  | 1.522(4)   | C30  | C32  | 1.523(5)   |

**Table S3-5.** Bond angles (°)

| atom | atom | atom | angle      | atom | atom | atom | angle      |
|------|------|------|------------|------|------|------|------------|
| Si1  | Mn1  | C1   | 106.93(8)  | Si1  | Mn1  | C11  | 122.93(7)  |
| Si1  | Mn1  | C22  | 114.61(7)  | C1   | Mn1  | C11  | 104.26(10) |
| C1   | Mn1  | C22  | 111.37(10) | C11  | Mn1  | C22  | 96.06(10)  |
| Mn1  | Si1  | Si2  | 129.15(4)  | Mn1  | Si1  | Si3  | 109.32(4)  |
| Mn1  | Si1  | Si4  | 105.86(4)  | Si2  | Si1  | Si3  | 103.15(4)  |
| Si2  | Si1  | Si4  | 102.77(5)  | Si3  | Si1  | Si4  | 104.05(5)  |
| Si1  | Si2  | C2   | 110.67(16) | Si1  | Si2  | C3   | 117.14(16) |
| Si1  | Si2  | C4   | 112.71(13) | C2   | Si2  | C3   | 104.9(2)   |
| C2   | Si2  | C4   | 106.3(2)   | C3   | Si2  | C4   | 104.26(19) |
| Si1  | Si3  | C5   | 114.93(17) | Si1  | Si3  | C6   | 109.96(17) |
| Si1  | Si3  | C7   | 112.92(13) | C5   | Si3  | C6   | 107.1(3)   |
| C5   | Si3  | C7   | 105.32(19) | C6   | Si3  | C7   | 106.0(2)   |
| Si1  | Si4  | C8   | 117.82(17) | Si1  | Si4  | C9   | 110.14(14) |
| Si1  | Si4  | C10  | 109.63(16) | C8   | Si4  | C9   | 104.8(2)   |
| C8   | Si4  | C10  | 107.1(2)   | C9   | Si4  | C10  | 106.7(2)   |
| C11  | N1   | C12  | 111.3(2)   | C11  | N1   | C14  | 121.3(2)   |
| C12  | N1   | C14  | 127.3(2)   | C11  | N2   | C13  | 111.7(2)   |
| C11  | N2   | C19  | 121.4(2)   | C13  | N2   | C19  | 126.9(2)   |
| C22  | N3   | C23  | 111.8(2)   | C22  | N3   | C25  | 121.0(2)   |
| C23  | N3   | C25  | 127.1(3)   | C22  | N4   | C24  | 111.1(2)   |
| C22  | N4   | C30  | 121.1(2)   | C24  | N4   | C30  | 127.5(2)   |
| Mn1  | C11  | N1   | 132.58(19) | Mn1  | C11  | N2   | 123.32(18) |
| N1   | C11  | N2   | 103.9(2)   | N1   | C12  | C13  | 106.8(3)   |
| N1   | C12  | C17  | 125.9(3)   | C13  | C12  | C17  | 127.4(3)   |
| N2   | C13  | C12  | 106.4(3)   | N2   | C13  | C18  | 125.3(3)   |
| C12  | C13  | C18  | 128.3(3)   | N1   | C14  | C15  | 112.2(3)   |
| N1   | C14  | C16  | 111.2(2)   | C15  | C14  | C16  | 112.9(3)   |
| N2   | C19  | C20  | 112.5(3)   | N2   | C19  | C21  | 111.5(3)   |
| C20  | C19  | C21  | 113.6(3)   | Mn1  | C22  | N3   | 127.66(19) |
| Mn1  | C22  | N4   | 126.60(18) | N3   | C22  | N4   | 103.9(2)   |
| N3   | C23  | C24  | 106.3(3)   | N3   | C23  | C28  | 125.7(3)   |
| C24  | C23  | C28  | 128.0(3)   | N4   | C24  | C23  | 106.9(3)   |
| N4   | C24  | C29  | 125.3(3)   | C23  | C24  | C29  | 127.8(3)   |
| N3   | C25  | C26  | 111.5(3)   | N3   | C25  | C27  | 111.3(3)   |
| C26  | C25  | C27  | 113.1(3)   | N4   | C30  | C31  | 112.8(3)   |
| N4   | C30  | C32  | 110.7(2)   | C31  | C30  | C32  | 112.4(3)   |

**Table S3-6.** Torsion Angles(<sup>o</sup>)

(Those having bond angles &gt; 160 or &lt; 20 degrees are excluded.)

| atom1 | atom2 | atom3 | atom4 | angle       | atom1 | atom2 | atom3 | atom4 | angle      |
|-------|-------|-------|-------|-------------|-------|-------|-------|-------|------------|
| C1    | Mn1   | Si1   | Si2   | -159.88(9)  | C1    | Mn1   | Si1   | Si3   | -33.26(9)  |
| C1    | Mn1   | Si1   | Si4   | 78.27(9)    | Si1   | Mn1   | C11   | N1    | 8.0(3)     |
| Si1   | Mn1   | C11   | N2    | -178.01(14) | C11   | Mn1   | Si1   | Si2   | -39.62(10) |
| C11   | Mn1   | Si1   | Si3   | 87.00(9)    | C11   | Mn1   | Si1   | Si4   | -161.47(8) |
| Si1   | Mn1   | C22   | N3    | 110.02(18)  | Si1   | Mn1   | C22   | N4    | -88.05(19) |
| C22   | Mn1   | Si1   | Si2   | 76.18(8)    | C22   | Mn1   | Si1   | Si3   | -157.21(7) |
| C22   | Mn1   | Si1   | Si4   | -45.67(8)   | C1    | Mn1   | C11   | N1    | 129.5(2)   |
| C1    | Mn1   | C11   | N2    | -56.5(2)    | C1    | Mn1   | C22   | N3    | -11.5(2)   |
| C1    | Mn1   | C22   | N4    | 150.41(18)  | C11   | Mn1   | C22   | N3    | -119.4(2)  |
| C11   | Mn1   | C22   | N4    | 42.5(2)     | C22   | Mn1   | C11   | N1    | -116.6(2)  |
| C22   | Mn1   | C11   | N2    | 57.4(2)     | Mn1   | Si1   | Si2   | C2    | -37.91(7)  |
| Mn1   | Si1   | Si2   | C3    | -158.08(4)  | Mn1   | Si1   | Si2   | C4    | 80.96(6)   |
| Mn1   | Si1   | Si3   | C5    | -174.66(4)  | Mn1   | Si1   | Si3   | C6    | -53.74(5)  |
| Mn1   | Si1   | Si3   | C7    | 64.48(6)    | Mn1   | Si1   | Si4   | C8    | -165.54(5) |
| Mn1   | Si1   | Si4   | C9    | -45.43(6)   | Mn1   | Si1   | Si4   | C10   | 71.73(5)   |
| Si2   | Si1   | Si3   | C5    | -34.40(6)   | Si2   | Si1   | Si3   | C6    | 86.53(5)   |
| Si2   | Si1   | Si3   | C7    | -155.25(5)  | Si3   | Si1   | Si2   | C2    | -166.85(4) |
| Si3   | Si1   | Si2   | C3    | 72.99(6)    | Si3   | Si1   | Si2   | C4    | -47.97(6)  |
| Si2   | Si1   | Si4   | C8    | 56.94(7)    | Si2   | Si1   | Si4   | C9    | 177.06(5)  |
| Si2   | Si1   | Si4   | C10   | -65.78(5)   | Si4   | Si1   | Si2   | C2    | 85.17(5)   |
| Si4   | Si1   | Si2   | C3    | -34.99(6)   | Si4   | Si1   | Si2   | C4    | -155.96(5) |
| Si3   | Si1   | Si4   | C8    | -50.35(7)   | Si3   | Si1   | Si4   | C9    | 69.76(6)   |
| Si3   | Si1   | Si4   | C10   | -173.08(4)  | Si4   | Si1   | Si3   | C5    | 72.62(6)   |
| Si4   | Si1   | Si3   | C6    | -166.46(4)  | Si4   | Si1   | Si3   | C7    | -48.24(6)  |
| C11   | N1    | C12   | C13   | 0.0(3)      | C11   | N1    | C12   | C17   | -178.8(2)  |
| C12   | N1    | C11   | Mn1   | 174.5(2)    | C12   | N1    | C11   | N2    | -0.3(3)    |
| C11   | N1    | C14   | C15   | 121.9(2)    | C11   | N1    | C14   | C16   | -110.6(3)  |
| C14   | N1    | C11   | Mn1   | -9.6(4)     | C14   | N1    | C11   | N2    | 175.5(2)   |
| C12   | N1    | C14   | C15   | -62.9(3)    | C12   | N1    | C14   | C16   | 64.6(3)    |
| C14   | N1    | C12   | C13   | -175.5(2)   | C14   | N1    | C12   | C17   | 5.6(4)     |
| C11   | N2    | C13   | C12   | -0.5(3)     | C11   | N2    | C13   | C18   | -179.9(2)  |
| C13   | N2    | C11   | Mn1   | -174.95(19) | C13   | N2    | C11   | N1    | 0.5(3)     |
| C11   | N2    | C19   | C20   | -116.4(3)   | C11   | N2    | C19   | C21   | 114.7(3)   |
| C19   | N2    | C11   | Mn1   | 5.5(3)      | C19   | N2    | C11   | N1    | -179.1(2)  |
| C13   | N2    | C19   | C20   | 64.1(3)     | C13   | N2    | C19   | C21   | -64.8(3)   |
| C19   | N2    | C13   | C12   | 179.0(2)    | C19   | N2    | C13   | C18   | -0.4(4)    |

|     |     |     |     |           |     |     |     |     |           |
|-----|-----|-----|-----|-----------|-----|-----|-----|-----|-----------|
| C22 | N3  | C23 | C24 | -0.5(3)   | C22 | N3  | C23 | C28 | -178.4(2) |
| C23 | N3  | C22 | Mn1 | 165.3(2)  | C23 | N3  | C22 | N4  | 0.1(3)    |
| C22 | N3  | C25 | C26 | -115.9(3) | C22 | N3  | C25 | C27 | 116.7(3)  |
| C25 | N3  | C22 | Mn1 | -16.9(4)  | C25 | N3  | C22 | N4  | 177.9(2)  |
| C23 | N3  | C25 | C26 | 61.5(4)   | C23 | N3  | C25 | C27 | -65.9(4)  |
| C25 | N3  | C23 | C24 | -178.1(2) | C25 | N3  | C23 | C28 | 4.0(5)    |
| C22 | N4  | C24 | C23 | -0.6(3)   | C22 | N4  | C24 | C29 | 177.2(2)  |
| C24 | N4  | C22 | Mn1 | -165.0(2) | C24 | N4  | C22 | N3  | 0.3(3)    |
| C22 | N4  | C30 | C31 | -121.9(2) | C22 | N4  | C30 | C32 | 111.2(3)  |
| C30 | N4  | C22 | Mn1 | 20.3(3)   | C30 | N4  | C22 | N3  | -174.3(2) |
| C24 | N4  | C30 | C31 | 64.4(3)   | C24 | N4  | C30 | C32 | -62.5(3)  |
| C30 | N4  | C24 | C23 | 173.6(2)  | C30 | N4  | C24 | C29 | -8.5(4)   |
| N1  | C12 | C13 | N2  | 0.3(3)    | N1  | C12 | C13 | C18 | 179.7(2)  |
| C17 | C12 | C13 | N2  | 179.1(3)  | C17 | C12 | C13 | C18 | -1.5(5)   |
| N3  | C23 | C24 | N4  | 0.7(3)    | N3  | C23 | C24 | C29 | -177.1(3) |
| C28 | C23 | C24 | N4  | 178.5(3)  | C28 | C23 | C24 | C29 | 0.7(6)    |

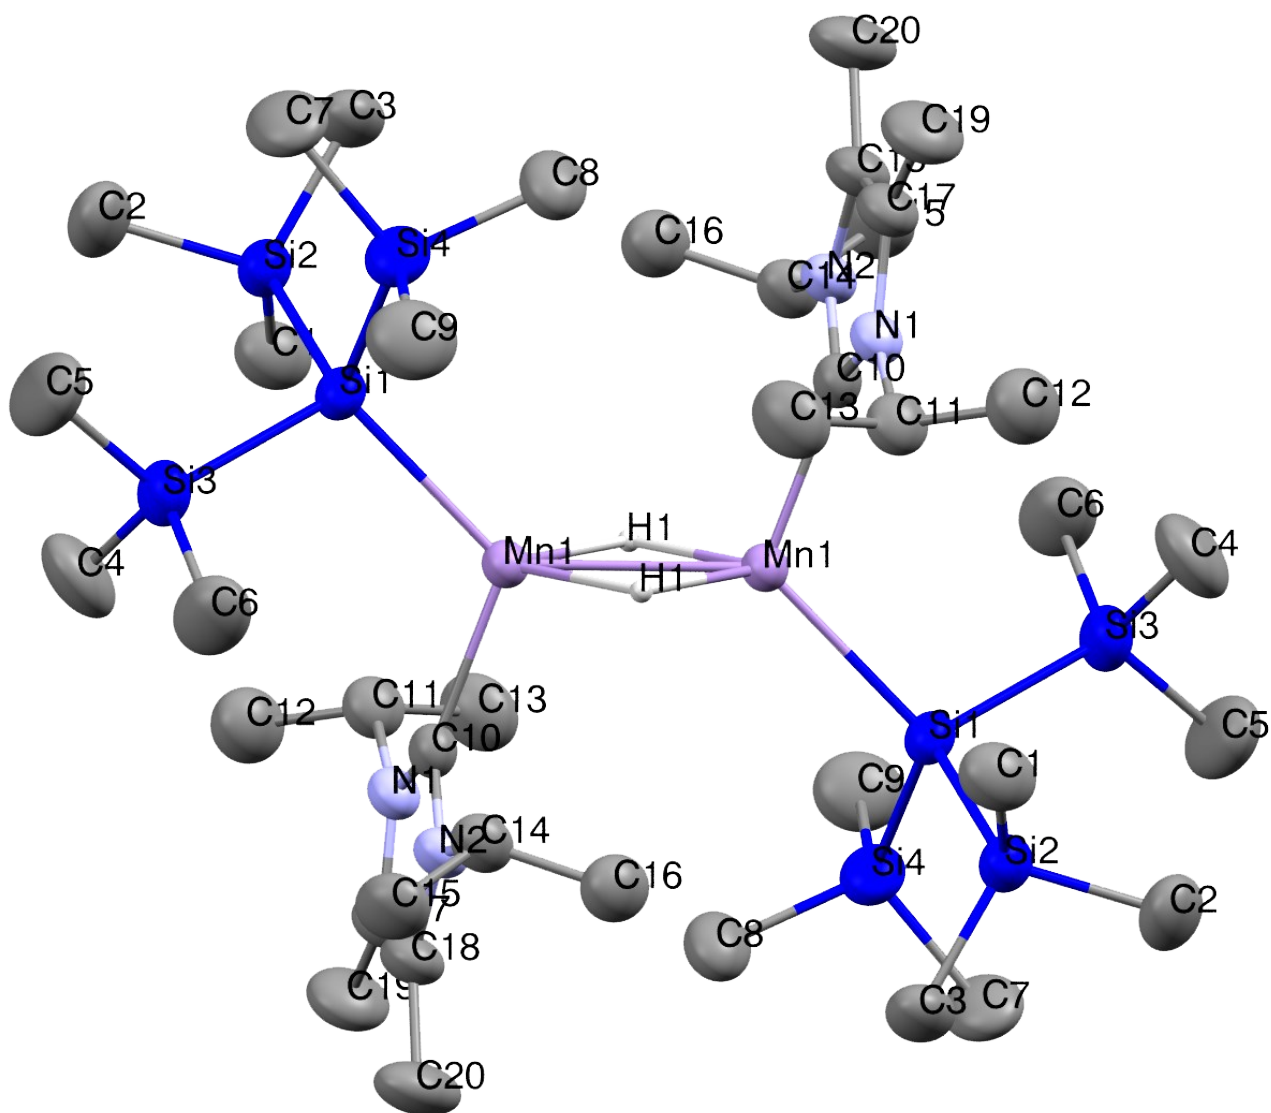

**Figure S10.** ORTEP drawing of **5** (50% probability of the thermal ellipsoids)



**Table S4-1.** Crystal data and structure refinement for **5**.

|                                                          |                                                                                                                                                                                 |
|----------------------------------------------------------|---------------------------------------------------------------------------------------------------------------------------------------------------------------------------------|
| Empirical Formula                                        | C <sub>40</sub> H <sub>96</sub> Mn <sub>2</sub> N <sub>4</sub> Si <sub>8</sub>                                                                                                  |
| Formula Weight                                           | 967.79                                                                                                                                                                          |
| Crystal Color, Habit                                     | orange, platelet                                                                                                                                                                |
| Crystal Dimensions                                       | 0.100 X 0.050 X 0.050 mm                                                                                                                                                        |
| Crystal System                                           | triclinic                                                                                                                                                                       |
| Lattice Type                                             | Primitive                                                                                                                                                                       |
| Lattice Parameters                                       | a = 9.769(4) Å<br>b = 12.962(5) Å<br>c = 14.713(5) Å<br>$\alpha = 97.083(5)^\circ$<br>$\beta = 97.254(5)^\circ$<br>$\gamma = 108.321(5)^\circ$<br>V = 1727.9(11) Å <sup>3</sup> |
| Space Group                                              | P-1 (#2)                                                                                                                                                                        |
| Z value                                                  | 2                                                                                                                                                                               |
| D <sub>calc</sub>                                        | 1.860 g/cm <sup>3</sup>                                                                                                                                                         |
| F <sub>000</sub>                                         | 1052.00                                                                                                                                                                         |
| $\mu$ (MoK $\alpha$ )                                    | 10.549 cm <sup>-1</sup>                                                                                                                                                         |
| Diffractometer                                           | Saturn724                                                                                                                                                                       |
| Radiation                                                | MoK $\alpha$ ( $\lambda = 0.71075$ Å)<br>multi-layer mirror monochromated                                                                                                       |
| Voltage, Current                                         | 50kV, 24mA                                                                                                                                                                      |
| Temperature                                              | -69.8°C                                                                                                                                                                         |
| Detector Aperture                                        | 72.8 x 72.8 mm                                                                                                                                                                  |
| Data Images                                              | 720 exposures                                                                                                                                                                   |
| $\omega$ oscillation Range ( $\chi=45.0$ , $\phi=0.0$ )  | -70.0 - 110.0°                                                                                                                                                                  |
| Exposure Rate                                            | 120.0 sec./°                                                                                                                                                                    |
| Detector Swing Angle                                     | 19.96°                                                                                                                                                                          |
| $\omega$ oscillation Range ( $\chi=45.0$ , $\phi=90.0$ ) | -70.0 - 110.0°                                                                                                                                                                  |
| Exposure Rate                                            | 120.0 sec./°                                                                                                                                                                    |
| Detector Swing Angle                                     | 19.96°                                                                                                                                                                          |
| Detector Position                                        | 44.77 mm                                                                                                                                                                        |
| Pixel Size                                               | 0.141 mm                                                                                                                                                                        |
| 2 $\theta$ <sub>max</sub>                                | 55.1°                                                                                                                                                                           |
| No. of Reflections Measured                              | Total: 14394<br>Unique: 7646 (R <sub>int</sub> = 0.1324)                                                                                                                        |
| Corrections                                              | Lorentz-polarization<br>Absorption                                                                                                                                              |

|                                       |                                                                                                                      |
|---------------------------------------|----------------------------------------------------------------------------------------------------------------------|
| Structure Solution                    | (trans. factors: 0.761 - 0.949)<br>Direct Methods (SHELXT Version 2014/5)                                            |
| Refinement                            | Full-matrix least-squares on $F^2$                                                                                   |
| Function Minimized                    | $\Sigma w (F_o^2 - F_c^2)^2$                                                                                         |
| Least Squares Weights                 | $w = 1 / [ \sigma^2(F_o^2) + (0.1098 \cdot P)^2 + 0.0000 \cdot P ]$<br>where $P = (\text{Max}(F_o^2, 0) + 2F_c^2)/3$ |
| $2\theta_{\text{max}}$ cutoff         | 55.1°                                                                                                                |
| Anomalous Dispersion                  | All non-hydrogen atoms                                                                                               |
| No. Observations (All reflections)    | 7644                                                                                                                 |
| No. Variables                         | 248                                                                                                                  |
| Reflection/Parameter Ratio            | 30.82                                                                                                                |
| Residuals: R1 ( $I > 2.00\sigma(I)$ ) | 0.0714                                                                                                               |
| Residuals: R (All reflections)        | 0.1030                                                                                                               |
| Residuals: wR2 (All reflections)      | 0.2151                                                                                                               |
| Goodness of Fit Indicator             | 1.029                                                                                                                |
| Max Shift/Error in Final Cycle        | 0.001                                                                                                                |
| Maximum peak in Final Diff. Map       | 0.78 e <sup>-</sup> /Å <sup>3</sup>                                                                                  |
| Minimum peak in Final Diff. Map       | -0.62 e <sup>-</sup> /Å <sup>3</sup>                                                                                 |

**Table S4-2.** Atomic coordinates and  $B_{\text{iso}}/B_{\text{eq}}$ 

| atom | x           | y           | z          | $B_{\text{eq}}$ |
|------|-------------|-------------|------------|-----------------|
| Mn1  | 0.56572(6)  | 0.50665(4)  | 0.59166(4) | 2.442(13)       |
| Si1  | 0.53689(12) | 0.37010(8)  | 0.70793(7) | 2.74(2)         |
| Si2  | 0.36436(13) | 0.35125(9)  | 0.80780(8) | 3.26(2)         |
| Si3  | 0.76209(14) | 0.42277(10) | 0.80825(8) | 3.88(2)         |
| Si4  | 0.50286(15) | 0.19105(9)  | 0.63576(9) | 3.73(2)         |
| N1   | 0.7101(4)   | 0.7556(2)   | 0.6950(2)  | 2.89(5)         |
| N2   | 0.8589(3)   | 0.7155(2)   | 0.6131(2)  | 3.04(5)         |
| C1   | 0.3285(6)   | 0.4848(4)   | 0.8349(4)  | 4.78(10)        |
| C2   | 0.4251(6)   | 0.3140(5)   | 0.9213(4)  | 5.48(11)        |
| C3   | 0.1830(5)   | 0.2412(4)   | 0.7610(4)  | 4.74(9)         |
| C4   | 0.7871(7)   | 0.5478(5)   | 0.8964(4)  | 6.75(14)        |
| C5   | 0.7989(8)   | 0.3169(6)   | 0.8753(5)  | 8.05(18)        |
| C6   | 0.9138(6)   | 0.4620(5)   | 0.7398(4)  | 6.28(13)        |
| C7   | 0.4683(7)   | 0.0854(4)   | 0.7152(4)  | 5.70(12)        |
| C8   | 0.3417(6)   | 0.1415(4)   | 0.5377(4)  | 4.91(10)        |
| C9   | 0.6679(6)   | 0.1852(4)   | 0.5834(4)  | 5.98(13)        |
| C10  | 0.7314(4)   | 0.6702(3)   | 0.6419(2)  | 2.73(6)         |
| C11  | 0.5802(5)   | 0.7376(3)   | 0.7393(3)  | 3.58(7)         |
| C12  | 0.6187(6)   | 0.7865(4)   | 0.8422(4)  | 5.46(11)        |
| C13  | 0.4677(6)   | 0.7753(4)   | 0.6867(4)  | 5.29(11)        |
| C14  | 0.9188(5)   | 0.6467(3)   | 0.5525(3)  | 3.44(7)         |
| C15  | 1.0772(5)   | 0.6602(4)   | 0.5901(4)  | 4.77(9)         |
| C16  | 0.8973(6)   | 0.6660(4)   | 0.4531(3)  | 4.61(9)         |
| C17  | 0.8219(5)   | 0.8534(3)   | 0.6958(3)  | 3.62(7)         |
| C18  | 0.9159(5)   | 0.8291(3)   | 0.6445(3)  | 3.79(8)         |
| C19  | 0.8284(6)   | 0.9642(3)   | 0.7433(4)  | 5.47(11)        |
| C20  | 1.0525(6)   | 0.9046(4)   | 0.6221(4)  | 5.78(12)        |

$$B_{\text{eq}} = 8/3 \pi^2 (U_{11}(aa^*)^2 + U_{22}(bb^*)^2 + U_{33}(cc^*)^2 + 2U_{12}(aa^*bb^*)\cos \gamma + 2U_{13}(aa^*cc^*)\cos \beta + 2U_{23}(bb^*cc^*)\cos \alpha)$$

**Table S4-3.** Anisotropic displacement parameters

| atom | $U_{11}$   | $U_{22}$   | $U_{33}$   | $U_{12}$   | $U_{13}$   | $U_{23}$   |
|------|------------|------------|------------|------------|------------|------------|
| Mn1  | 0.0311(3)  | 0.0298(3)  | 0.0303(3)  | 0.0090(2)  | 0.0029(2)  | 0.0050(2)  |
| Si1  | 0.0384(6)  | 0.0352(5)  | 0.0336(5)  | 0.0151(4)  | 0.0067(4)  | 0.0094(4)  |
| Si2  | 0.0428(7)  | 0.0470(6)  | 0.0340(6)  | 0.0133(5)  | 0.0096(5)  | 0.0089(4)  |
| Si3  | 0.0413(7)  | 0.0635(7)  | 0.0439(6)  | 0.0195(6)  | 0.0011(5)  | 0.0159(5)  |
| Si4  | 0.0585(8)  | 0.0363(6)  | 0.0531(7)  | 0.0226(5)  | 0.0124(6)  | 0.0097(5)  |
| N1   | 0.0370(17) | 0.0322(15) | 0.0369(16) | 0.0101(13) | 0.0018(14) | 0.0013(12) |

|     |            |            |            |            |            |             |
|-----|------------|------------|------------|------------|------------|-------------|
| N2  | 0.0321(17) | 0.0381(16) | 0.0399(17) | 0.0057(13) | 0.0049(14) | 0.0039(13)  |
| C1  | 0.058(3)   | 0.058(3)   | 0.064(3)   | 0.020(2)   | 0.021(3)   | -0.002(2)   |
| C2  | 0.067(4)   | 0.095(4)   | 0.049(3)   | 0.023(3)   | 0.018(3)   | 0.025(3)    |
| C3  | 0.046(3)   | 0.065(3)   | 0.060(3)   | 0.002(2)   | 0.014(2)   | 0.015(2)    |
| C4  | 0.067(4)   | 0.091(4)   | 0.069(4)   | 0.007(3)   | -0.012(3)  | -0.020(3)   |
| C5  | 0.079(5)   | 0.122(5)   | 0.111(5)   | 0.030(4)   | -0.005(4)  | 0.071(4)    |
| C6  | 0.044(3)   | 0.111(4)   | 0.093(4)   | 0.029(3)   | 0.015(3)   | 0.040(4)    |
| C7  | 0.084(4)   | 0.041(2)   | 0.096(4)   | 0.026(3)   | 0.006(3)   | 0.025(2)    |
| C8  | 0.077(4)   | 0.046(2)   | 0.057(3)   | 0.019(2)   | 0.001(3)   | -0.001(2)   |
| C9  | 0.078(4)   | 0.065(3)   | 0.095(4)   | 0.038(3)   | 0.031(3)   | -0.001(3)   |
| C10 | 0.0331(19) | 0.0392(18) | 0.0319(18) | 0.0136(15) | 0.0036(15) | 0.0067(14)  |
| C11 | 0.049(2)   | 0.043(2)   | 0.045(2)   | 0.0185(19) | 0.0102(19) | -0.0005(17) |
| C12 | 0.070(4)   | 0.076(3)   | 0.060(3)   | 0.023(3)   | 0.019(3)   | 0.003(3)    |
| C13 | 0.051(3)   | 0.072(3)   | 0.083(4)   | 0.032(3)   | 0.007(3)   | 0.004(3)    |
| C14 | 0.034(2)   | 0.049(2)   | 0.047(2)   | 0.0138(17) | 0.0117(18) | 0.0032(18)  |
| C15 | 0.036(2)   | 0.071(3)   | 0.076(3)   | 0.018(2)   | 0.013(2)   | 0.020(3)    |
| C16 | 0.059(3)   | 0.064(3)   | 0.052(3)   | 0.018(2)   | 0.018(2)   | 0.007(2)    |
| C17 | 0.044(2)   | 0.0349(19) | 0.049(2)   | 0.0042(17) | 0.0023(19) | -0.0003(17) |
| C18 | 0.038(2)   | 0.039(2)   | 0.055(3)   | 0.0002(17) | 0.0019(19) | 0.0050(18)  |
| C19 | 0.076(4)   | 0.038(2)   | 0.080(4)   | 0.008(2)   | 0.010(3)   | -0.008(2)   |
| C20 | 0.062(3)   | 0.051(3)   | 0.084(4)   | -0.010(2)  | 0.021(3)   | -0.002(2)   |

The general temperature factor expression:  $\exp(-2\pi^2(a^2U_{11}h^2 + b^2U_{22}k^2 + c^2U_{33}l^2 + 2a*b*U_{12}hk + 2a*c*U_{13}hl + 2b*c*U_{23}kl))$

**Table S4-4.** Bond lengths (Å)

| atom | atom             | distance   | atom | atom | distance   |
|------|------------------|------------|------|------|------------|
| Mn1  | Mn1 <sup>1</sup> | 2.7972(12) | Mn1  | Si1  | 2.5871(14) |
| Mn1  | C10              | 2.194(3)   | Si1  | Si2  | 2.3482(19) |
| Si1  | Si3              | 2.3391(17) | Si1  | Si4  | 2.3329(18) |
| Si2  | C1               | 1.877(5)   | Si2  | C2   | 1.872(6)   |
| Si2  | C3               | 1.873(4)   | Si3  | C4   | 1.877(6)   |
| Si3  | C5               | 1.882(8)   | Si3  | C6   | 1.870(6)   |
| Si4  | C7               | 1.887(6)   | Si4  | C8   | 1.880(5)   |
| Si4  | C9               | 1.891(7)   | N1   | C10  | 1.361(5)   |
| N1   | C11              | 1.466(6)   | N1   | C17  | 1.387(4)   |
| N2   | C10              | 1.345(5)   | N2   | C14  | 1.482(6)   |
| N2   | C18              | 1.394(5)   | C11  | C12  | 1.518(7)   |
| C11  | C13              | 1.503(8)   | C14  | C15  | 1.523(7)   |
| C14  | C16              | 1.515(7)   | C17  | C18  | 1.345(7)   |
| C17  | C19              | 1.496(6)   | C18  | C20  | 1.489(7)   |

Mn1 H1 1.91(3) Mn1 H1<sup>1</sup> 1.99(3)

Symmetry Operators:

(1) -X+1,-Y+1,-Z+1

**Table S4-5.** Bond angles (°)

| atom             | atom | atom | angle      | atom             | atom | atom | angle      |
|------------------|------|------|------------|------------------|------|------|------------|
| Mn1 <sup>1</sup> | Mn1  | Si1  | 134.23(3)  | Mn1 <sup>1</sup> | Mn1  | C10  | 110.02(10) |
| Si1              | Mn1  | C10  | 115.74(10) | Mn1              | Si1  | Si2  | 122.34(6)  |
| Mn1              | Si1  | Si3  | 106.68(5)  | Mn1              | Si1  | Si4  | 112.26(6)  |
| Si2              | Si1  | Si3  | 104.21(6)  | Si2              | Si1  | Si4  | 105.50(6)  |
| Si3              | Si1  | Si4  | 104.19(7)  | Si1              | Si2  | C1   | 109.78(18) |
| Si1              | Si2  | C2   | 113.4(2)   | Si1              | Si2  | C3   | 114.86(18) |
| C1               | Si2  | C2   | 107.3(3)   | C1               | Si2  | C3   | 107.2(2)   |
| C2               | Si2  | C3   | 103.8(2)   | Si1              | Si3  | C4   | 111.0(2)   |
| Si1              | Si3  | C5   | 117.14(19) | Si1              | Si3  | C6   | 109.33(19) |
| C4               | Si3  | C5   | 106.5(3)   | C4               | Si3  | C6   | 106.6(3)   |
| C5               | Si3  | C6   | 105.6(3)   | Si1              | Si4  | C7   | 114.42(18) |
| Si1              | Si4  | C8   | 110.87(18) | Si1              | Si4  | C9   | 111.00(16) |
| C7               | Si4  | C8   | 106.4(2)   | C7               | Si4  | C9   | 107.0(3)   |
| C8               | Si4  | C9   | 106.7(3)   | C10              | N1   | C11  | 120.6(3)   |
| C10              | N1   | C17  | 110.3(3)   | C11              | N1   | C17  | 129.0(3)   |
| C10              | N2   | C14  | 120.5(3)   | C10              | N2   | C18  | 111.4(3)   |
| C14              | N2   | C18  | 128.0(3)   | Mn1              | C10  | N1   | 125.1(3)   |
| Mn1              | C10  | N2   | 128.7(3)   | N1               | C10  | N2   | 104.8(3)   |
| N1               | C11  | C12  | 112.3(4)   | N1               | C11  | C13  | 111.1(4)   |
| C12              | C11  | C13  | 113.2(5)   | N2               | C14  | C15  | 112.7(3)   |
| N2               | C14  | C16  | 111.0(4)   | C15              | C14  | C16  | 112.6(4)   |
| N1               | C17  | C18  | 107.4(3)   | N1               | C17  | C19  | 124.4(4)   |
| C18              | C17  | C19  | 128.2(4)   | N2               | C18  | C17  | 106.0(3)   |
| N2               | C18  | C20  | 125.0(4)   | C17              | C18  | C20  | 128.9(4)   |

Symmetry Operators:

(1) -X+1,-Y+1,-Z+1

**Table S4-6.** Torsion Angles(°)

(Those having bond angles > 160 or < 20 degrees are excluded.)

| atom1            | atom2 | atom3            | atom4            | angle     | atom1            | atom2 | atom3            | atom4            | angle     |
|------------------|-------|------------------|------------------|-----------|------------------|-------|------------------|------------------|-----------|
| Mn1 <sup>1</sup> | Mn1   | Si1              | Si2              | -88.30(6) | Mn1 <sup>1</sup> | Mn1   | Si1              | Si3              | 152.17(4) |
| Mn1 <sup>1</sup> | Mn1   | Si1              | Si4              | 38.64(8)  | Si1              | Mn1   | Mn1 <sup>1</sup> | Si1 <sup>1</sup> | 180.00(5) |
| Si1              | Mn1   | Mn1 <sup>1</sup> | C10 <sup>1</sup> | 1.47(6)   | Mn1 <sup>1</sup> | Mn1   | C10              | N1               | 97.9(3)   |

|                  |     |                  |                  |            |     |     |                  |                  |             |
|------------------|-----|------------------|------------------|------------|-----|-----|------------------|------------------|-------------|
| Mn1 <sup>1</sup> | Mn1 | C10              | N2               | -66.6(3)   | C10 | Mn1 | Mn1 <sup>1</sup> | Si1 <sup>1</sup> | -1.47(13)   |
| C10              | Mn1 | Mn1 <sup>1</sup> | C10 <sup>1</sup> | 180.00(12) | Si1 | Mn1 | C10              | N1               | -83.2(3)    |
| Si1              | Mn1 | C10              | N2               | 112.2(3)   | C10 | Mn1 | Si1              | Si2              | 93.23(13)   |
| C10              | Mn1 | Si1              | Si3              | -26.31(14) | C10 | Mn1 | Si1              | Si4              | -139.84(13) |
| Mn1              | Si1 | Si2              | C1               | -28.54(7)  | Mn1 | Si1 | Si2              | C2               | -148.49(5)  |
| Mn1              | Si1 | Si2              | C3               | 92.34(8)   | Mn1 | Si1 | Si3              | C4               | 76.60(8)    |
| Mn1              | Si1 | Si3              | C5               | -160.81(6) | Mn1 | Si1 | Si3              | C6               | -40.77(8)   |
| Mn1              | Si1 | Si4              | C7               | -176.06(6) | Mn1 | Si1 | Si4              | C8               | -55.77(8)   |
| Mn1              | Si1 | Si4              | C9               | 62.70(8)   | Si2 | Si1 | Si3              | C4               | -54.08(8)   |
| Si2              | Si1 | Si3              | C5               | 68.50(9)   | Si2 | Si1 | Si3              | C6               | -171.45(6)  |
| Si3              | Si1 | Si2              | C1               | 92.17(7)   | Si3 | Si1 | Si2              | C2               | -27.77(8)   |
| Si3              | Si1 | Si2              | C3               | -146.95(7) | Si2 | Si1 | Si4              | C7               | -40.55(9)   |
| Si2              | Si1 | Si4              | C8               | 79.73(8)   | Si2 | Si1 | Si4              | C9               | -161.80(6)  |
| Si4              | Si1 | Si2              | C1               | -158.40(6) | Si4 | Si1 | Si2              | C2               | 81.66(7)    |
| Si4              | Si1 | Si2              | C3               | -37.51(9)  | Si3 | Si1 | Si4              | C7               | 68.89(9)    |
| Si3              | Si1 | Si4              | C8               | -170.82(6) | Si3 | Si1 | Si4              | C9               | -52.35(8)   |
| Si4              | Si1 | Si3              | C4               | -164.47(6) | Si4 | Si1 | Si3              | C5               | -41.89(9)   |
| Si4              | Si1 | Si3              | C6               | 78.16(8)   | C10 | N1  | C11              | C12              | 129.7(3)    |
| C10              | N1  | C11              | C13              | -102.3(4)  | C11 | N1  | C10              | Mn1              | 12.6(5)     |
| C11              | N1  | C10              | N2               | -179.8(3)  | C10 | N1  | C17              | C18              | -1.3(4)     |
| C10              | N1  | C17              | C19              | 176.6(3)   | C17 | N1  | C10              | Mn1              | -165.5(3)   |
| C17              | N1  | C10              | N2               | 2.1(4)     | C11 | N1  | C17              | C18              | -179.2(3)   |
| C11              | N1  | C17              | C19              | -1.3(6)    | C17 | N1  | C11              | C12              | -52.5(5)    |
| C17              | N1  | C11              | C13              | 75.4(4)    | C10 | N2  | C14              | C15              | -128.1(3)   |
| C10              | N2  | C14              | C16              | 104.6(4)   | C14 | N2  | C10              | Mn1              | -12.8(5)    |
| C14              | N2  | C10              | N1               | -179.8(3)  | C10 | N2  | C18              | C17              | 1.4(4)      |
| C10              | N2  | C18              | C20              | -177.6(3)  | C18 | N2  | C10              | Mn1              | 164.9(3)    |
| C18              | N2  | C10              | N1               | -2.1(4)    | C14 | N2  | C18              | C17              | 178.9(3)    |
| C14              | N2  | C18              | C20              | -0.1(6)    | C18 | N2  | C14              | C15              | 54.6(5)     |
| C18              | N2  | C14              | C16              | -72.7(5)   | N1  | C17 | C18              | N2               | -0.1(5)     |
| N1               | C17 | C18              | C20              | 178.9(4)   | C19 | C17 | C18              | N2               | -177.9(4)   |
| C19              | C17 | C18              | C20              | 1.1(8)     |     |     |                  |                  |             |

Symmetry Operators:

(1) -X+1,-Y+1,-Z+1

## References

- (1) a) C. Marschner, *Eur. J. Inorg. Chem.* 1998, 221-226; b) C. Kayser, R. Fischer, J. Baumgartner and C. Marschner, *Organometallics*, 2002, **21**, 1023-1030.
- (2) N. F. Chilton, R. P. Anderson, L. D. Turner, A. Soncini and K. S. Murray, *J. Comput. Chem.*, 2013, **34**, 1164-1175.
- (3) SIR2008: M. C. Burla, R. Caliandro, M. Camalli, B. Carrozzini, G. L. Casciarano, L. De Caro, C. Giacovazzo, G. Polidori, D. Siliqi and R. Spagna, *J. Appl. Cryst.*, 2007, **40**, 609-613.
- (4) International Tables for Crystallography, Vol. C; (Ed. A. J. C. Wilson) Kluwer Academic Publishers, Dordrecht, Netherlands, Table 6.1.1.4, 1992, pp. 572.
- (5) J. A. Ibers and W. C. Hamilton, *Acta Cryst.*, 1964, **17**, 781-782.
- (6) D. C. Creagh and W. J. McAuley, in *International Tables for Crystallography, Vol C*; (Ed. A. J. C. Wilson), Kluwer Academic Publishers, Dordrecht, Netherlands, Table 4.2.6.8, 1992, pages 219-222.
- (7) D. C. Creagh and J. H. Hubbell, in *International Tables for Crystallography, Vol C*; (Ed. A. J. C. Wilson), Kluwer Academic Publishers, Boston, Table 4.2.4.3, 1992, pages 200-206.
- (8) CrystalStructure 4.2.5: Crystal Structure Analysis Package, Rigaku Corporation (2000-2017). Tokyo 196-8666, Japan.
- (9) SHELXL Version 2017/1: G. M. Sheldrick, *Acta Cryst.*, 2008, **A64**, 112-122.
